# Supplementary material for: Sensitivity of fasting glucose for gestational diabetes mellitus screening in Mexican adolescents based on International Association of Diabetes and Pregnancy Study Groups criteria: a diagnostic accuracy study based on retrospective data analysis
Source: PubMed Central journal article supplement — BMJ Open. 2018 Apr 13;8(4):e021617. doi: 10.1136/bmjopen-2018-021617 (PMC5905784; doi:10.1136/bmjopen-2018-021617), 2018-04-13

# BMJ Open

BMJ Open is committed to open peer review. As part of this commitment we make the peer review history of every article we publish publicly available.

When an article is published we post the peer reviewers' comments and the authors' responses online. We also post the versions of the paper that were used during peer review. These are the versions that the peer review comments apply to.

The versions of the paper that follow are the versions that were submitted during the peer review process. They are not the versions of record or the final published versions. They should not be cited or distributed as the published version of this manuscript.

BMJ Open is an open access journal and the full, final, typeset and author-corrected version of record of the manuscript is available on our site with no access controls, subscription charges or pay-per-view fees (<http://bmjopen.bmj.com>).

If you have any questions on BMJ Open's open peer review process please email [info.bmjopen@bmj.com](mailto:info.bmjopen@bmj.com)

# BMJ Open

**Sensitivity of fasting glucose for gestational diabetes mellitus screening in Mexican adolescents based on the International Association of Diabetes and Pregnancy Study Groups criteria: a diagnostic accuracy study based on retrospective data analysis**

|                               |                                                                                                                                                                                                                                                                                                                                                                                                                                                                                                                                                                                                                                                                                                                                                                                                                                                                                                                                                                                                                                                                                                                                            |
|-------------------------------|--------------------------------------------------------------------------------------------------------------------------------------------------------------------------------------------------------------------------------------------------------------------------------------------------------------------------------------------------------------------------------------------------------------------------------------------------------------------------------------------------------------------------------------------------------------------------------------------------------------------------------------------------------------------------------------------------------------------------------------------------------------------------------------------------------------------------------------------------------------------------------------------------------------------------------------------------------------------------------------------------------------------------------------------------------------------------------------------------------------------------------------------|
| Journal:                      | <i>BMJ Open</i>                                                                                                                                                                                                                                                                                                                                                                                                                                                                                                                                                                                                                                                                                                                                                                                                                                                                                                                                                                                                                                                                                                                            |
| Manuscript ID                 | bmjopen-2018-021617                                                                                                                                                                                                                                                                                                                                                                                                                                                                                                                                                                                                                                                                                                                                                                                                                                                                                                                                                                                                                                                                                                                        |
| Article Type:                 | Research                                                                                                                                                                                                                                                                                                                                                                                                                                                                                                                                                                                                                                                                                                                                                                                                                                                                                                                                                                                                                                                                                                                                   |
| Date Submitted by the Author: | 08-Jan-2018                                                                                                                                                                                                                                                                                                                                                                                                                                                                                                                                                                                                                                                                                                                                                                                                                                                                                                                                                                                                                                                                                                                                |
| Complete List of Authors:     | Reyes-Muñoz, Enrique; Instituto Nacional de Perinatología Isidro Espinosa de los Reyes , Endocrinology<br>Sandoval-Osuna, Norma; Instituto Nacional de Perinatología, Division of Obstetrics and Gynecology<br>Reyes-Mayoral, Christian ; Instituto Nacional de Perinatología Isidro Espinosa de los Reyes , Division of Obstetrics and Gynecology<br>Ortega-González , Carlos; Instituto Nacional de Perinatología Isidro Espinosa de los Reyes , Endocrinology<br>Martínez-Cruz, Nayeli; Instituto Nacional de Perinatología Isidro Espinosa de los Reyes , Endocrinology<br>Ramírez-Torres, María; Instituto Nacional de Perinatología Isidro Espinosa de los Reyes , Endocrinology<br>Arce-Sánchez, Lidia; Instituto Nacional de Perinatología Isidro Espinosa de los Reyes , Endocrinology<br>Lira-Plascencia, Josefina; Instituto Nacional de Perinatología Isidro Espinosa de los Reyes , Research Unit in Adolescent Medicine<br>Estrada-Gutiérrez, Guadalupe; Instituto Nacional de Perinatología Isidro Espinosa de los Reyes , Division of Biomedical Research<br>Montoya-Estrada, Araceli; Instituto Nacional de Perinatología |
| Keywords:                     | gestational diabetes, IADPSG, hyperglycemia, pregnancy, adolescent                                                                                                                                                                                                                                                                                                                                                                                                                                                                                                                                                                                                                                                                                                                                                                                                                                                                                                                                                                                                                                                                         |

SCHOLARONE™  
Manuscripts

1  
2  
3 **Sensitivity of fasting glucose for gestational diabetes mellitus screening in Mexican**  
4 **adolescents based on the International Association of Diabetes and Pregnancy Study**  
5 **Groups criteria: a diagnostic accuracy study based on retrospective data analysis**  
6  
7  
8  
9

10  
11  
12 Enrique Reyes-Muñoz<sup>1</sup>, Norma L. Sandoval-Osuna<sup>2</sup>, Christian Reyes-Mayoral<sup>2</sup>, Carlos Ortega-  
13 González<sup>3</sup>, Nayeli Martínez-Cruz<sup>3</sup>, María A. Ramírez-Torres<sup>3</sup>, Lidia Arce-Sánchez<sup>3</sup>, Josefina  
14 Lira-Plascencia<sup>4</sup>, Guadalupe Estrada-Gutiérrez<sup>5</sup>, Montoya-Estrada Araceli<sup>1</sup>.  
15  
16

17  
18 <sup>1</sup>Department of Gynecological and Perinatal Endocrinology, <sup>2</sup>Division of Obstetrics and  
19 Gynecology, <sup>3</sup>Department of Endocrinology, <sup>4</sup>Research Unit in Adolescent Medicine, <sup>5</sup>Direction  
20 of Research, Instituto Nacional de Perinatología Isidro Espinosa de los Reyes, Mexico City,  
21 Mexico.  
22  
23  
24  
25

26  
27  
28 Correspondence:

29  
30 Enrique Reyes Muñoz

31  
32 Department of Gynecological and Perinatal Endocrinology, Instituto Nacional de Perinatología  
33 Isidro Espinosa de los Reyes, Mexico City.  
34

35  
36 Montes Urales 800, Lomas Virreyes, Miguel Hidalgo. México, DF, CP 11000

37  
38 Phone: +52 (55) 55209900 ext. 299

39  
40 e-mail: dr.enriquereyes@gmail.com  
41

42  
43 **Keywords:** gestational diabetes, IADPSG, hyperglycemia, pregnancy, adolescent.  
44  
45

46  
47 **Word count:** 3645  
48  
49  
50  
51  
52  
53  
54  
55  
56  
57  
58  
59  
60

## ABSTRACT

**Objective:** To evaluate the usefulness of fasting glucose for gestational diabetes mellitus (GDM) screening in Mexican adolescents using the International Association of Diabetes and Pregnancy Study Groups (IADPSG) criteria. Secondary goals were to report the prevalence of GDM and perinatal outcomes in adolescent women with and without GDM.

**Design:** Retrospective cohort study

**Setting:** Level-three medical institution in Mexico City.

**Participants:** We included 1061 adolescent women aged 12 to 19 years with singleton pregnancy, 75-g oral glucose tolerance test (OGTT) administered between 11 and 35 weeks of gestation and had delivered in our institution.

**Primary and secondary outcome measures:** We calculated sensitivity, specificity, positive and negative predictive values (PPV and NPV, respectively), and positive and negative likelihood ratios (LR+ and –, respectively) with 95% confidence intervals for five fasting glucose cut-offs for GDM screening. We used IADPSG criteria to diagnose GDM. Different fasting glucose cut-offs were determined based on the receiver operating characteristic curve. Secondary measures were the prevalence of GDM and the frequency of perinatal outcomes in women with and without GDM.

**Results:** GDM was presented in 71 (6.7%) women. Fasting glucose  $\geq 80$  (4.5 mmol/L), 85 (4.7 mmol/L), and 90 mg/dL (5.0 mmol/L) were evaluated as cut-offs for the detection of GDM. These three cut-offs were characterized as follows: sensitivity: 97%, 94%, and 91%; specificity: 50%, 79%, and 97%; PPV: 12%, 23%, and 64%; NPV: 99% at all three points; LR (+): 1.9, 4.3, and 26.7; and LR (-): 0.06, 0.07, and 0.09, respectively. No significant differences in perinatal outcomes were found between adolescents with and without GDM.

1  
2  
3 **Conclusions:** A fasting glucose cut-off of  $\geq 90$  mg/dL (5.0 mmol/L) could be useful for GDM  
4 screening in Mexican adolescent women. This value provides an adequate detection rate and is  
5 a lower cost than the universal administration of one-step OGTT screening  
6  
7  
8  
9  
10

### 11 **Strengths and limitations of this research**

- 14 • We show that a fasting glucose cut-off of  $\geq 90$  mg/dL (5.0 mmol/L) could be useful for  
15 GDM screening in Mexican adolescent women.
  - 18 • This is the first study in Mexico and Latin America that explores the prevalence of GDM  
19 in adolescent women using IADPSG criteria.
  - 22 • The study was retrospective, in a single centre and the results could be applicable to only  
23 Mexican, and, potentially, Latin women.
  - 26 • The diagnostic validity of the test was not confirmed in a second independent population.
  - 29 • The sample size is limited to compare perinatal outcomes.
- 31  
32  
33  
34  
35  
36  
37  
38  
39  
40  
41  
42  
43  
44  
45  
46  
47  
48  
49  
50  
51  
52  
53  
54  
55  
56  
57  
58  
59  
60

## INTRODUCTION

Roughly 16 million women between the ages of 15 and 19 give birth each year, accounting for approximately 11% of all births worldwide. Ninety-five percent of these births occur in low- and middle-income countries: 18% in Latin America and the Caribbean and more than 50% in sub-Saharan Africa. [1] Latin women (including Mexican women) are considered a high-risk population for diabetes and gestational diabetes mellitus (GDM). [2]

GDM refers to diabetes diagnosed in the second or third trimester of pregnancy that is not clearly overt diabetes. [2] A recently published adolescent pregnancy guideline recommended testing all adolescent women for GDM, similar to adult women, although the prevalence of GDM is generally lower in adolescent populations. [3]

Previous studies have reported GDM prevalence rates of 1.7% among North American adolescent women [4] and 0.97% in Mexican adolescent women; [5] both of these studies used Carpenter and Coustan criteria to diagnose GDM. [6] However, reports about the prevalence of GDM in adolescents diagnosed using the new International Association of Diabetes and Pregnancy Study Groups (IADPSG) criteria are limited. In adult Mexican women, we previously reported a prevalence of 30.3% of GDM using the IADPSG criteria; this figure is three-fold more than the prevalence obtained using the previous American Diabetes Association (ADA) criteria, which was valid until 2010. [7]

Pregnant adolescent women have less prevalence of being overweight or obese than the general pregnant population in Mexico. Additionally, most pregnant Mexican adolescent women are primigravid. In part, these characteristics contribute to a low prevalence of GDM in adolescent women. [8,9] However, most pregnant Mexican adolescent women have lower socioeconomic status than adult women, [8] and lower socioeconomic status has been associated

1  
2  
3 with a higher frequency of consumption of unhealthy foods such as soft drinks, [10] which are  
4 associated with increased risk of GDM among Mexican women.  
5  
6

7  
8 Currently, the screening and diagnosis of GDM in adolescent women is controversial because  
9 there is a low prevalence of GDM in this population and the strategies for diagnosing GDM are  
10 non-universal. The hyperglycaemia and adverse pregnancy outcomes (HAPO) study revealed  
11 significant associations between fasting and both 1- and 2-h glucose values during 75-g/2-h oral  
12 glucose tolerance test (75-g/2-h OGTT) and adverse perinatal outcomes. [11] Following the  
13 HAPO study results, the IADPSG recommended new criteria for the diagnosis and classification  
14 of hyperglycaemia during pregnancy. [12] According to the IADPSG, these new glucose  
15 thresholds correspond to 1.75 times the estimated odds for neonatal birth weight >90th  
16 percentile, cord C-peptide >90th percentile, and body fat percentage >90th percentile. [12]  
17  
18 Some international associations support the use of the IADPSG criteria, including the ADA, [2]  
19 Endocrine Society, [13] World Health Organization (WHO), [14] and International Federation of  
20 Gynaecology and Obstetrics (FIGO). [15] However, other organizations such as the American  
21 Congress of Obstetricians and Gynecologists (ACOG) and the National Institute of Child Health  
22 and Human Development (NICHD) recommend that health care providers continue to use a  
23 two-step approach to screen and diagnose GDM. [16,17] They argue that no evidence supports  
24 clinically significant improvements in maternal or new-born outcomes as a result of using  
25 IADPSG criteria to diagnose GDM and that following these criteria leads to a significant increase  
26 in health care costs. [16,17] All of the abovementioned organizations recommend universal  
27 screening for GDM using a one or two step strategy and do not have specific recommendations  
28 regarding GDM screening for adolescent women.  
29  
30  
31  
32  
33  
34  
35  
36  
37  
38  
39  
40  
41  
42  
43  
44  
45  
46  
47  
48  
49  
50

51 In contrast, the National Institute for Health and Care Excellence's (NICE) recent guidelines on  
52 diabetes in pregnancy recommend conducting 75-g/2-h OGTT at 24–28 weeks to test for GDM  
53 in women with risk factors, and proposed a diagnosis of GDM if women have one of the  
54  
55  
56  
57  
58  
59  
60

1  
2  
3 following: a fasting glucose level  $\geq 100$  mg/dL (5.6 mmol/L) or a 2-h glucose level  $\geq 140$  mg/dL  
4  
5 (7.8 mmol/L) during a 75-g/2h OGTT. [18] In accordance with this guideline, adolescent women  
6  
7 should be tested for GDM if they have body mass index (BMI)  $\geq 30$  kg/m<sup>2</sup>, a previous  
8  
9 macrosomic baby weighing  $\geq 4.5$  kg or gestational diabetes, a first-degree relative with diabetes,  
10  
11 and an ethnic family origin with a high prevalence of diabetes.  
12

13  
14 Agarwal MM, et al. recommended that the fasting plasma glucose can be used to decide if the  
15  
16 OGTT is needed or not. This would ease the burden on the laboratory and save resources as  
17  
18 the IADPSG recommendation to make every pregnant woman undergo the 75-g/2-h OGTT is  
19  
20 too demanding. [19]  
21

22  
23 A systematic review and meta-analysis on GDM screening tests concluded that glucose  
24  
25 challenge tests and fasting plasma glucose levels at 24 weeks of gestation are useful for  
26  
27 identifying women who do not have GDM. [20] However, there are no studies that have  
28  
29 analysed the utility of fasting glucose for the screening of GDM in adolescent women.  
30

31  
32 Our goal was to evaluate the usefulness of fasting glucose for GDM screening in Mexican  
33  
34 adolescent women using IADPSG diagnostic criteria. Secondary goals were to report the  
35  
36 prevalence of GDM and perinatal outcomes in adolescent women with and without GDM.  
37  
38  
39  
40  
41

## 42 **METHODS**

### 43 **Study design and participants**

44  
45 We conducted a retrospective cohort study and included adolescents who received prenatal  
46  
47 care at Instituto Nacional de Perinatología (INPer), in Mexico City, from June 1<sup>st</sup>, 2011 to June  
48  
49 30<sup>th</sup>, 2014. Our institution is a reference centre that attends to high risk pregnancies, including  
50  
51 those in adolescent women. Nearly 4000 births are attended at our institution every year. This  
52  
53  
54  
55  
56  
57



1  
2  
3 study was approved by the Internal Review Board of the INPer (Register number 212250-  
4 42081). Written informed consent from participants is not required by the Internal Review Board  
5 at our institution for retrospective studies. The inclusion criteria were women who were 12 to 19  
6 years old, had a singleton pregnancy, had received a 75-g/2-h OGTT administered between 11  
7 and 35 weeks of gestation, and had delivered in our institution. We excluded women with any  
8 pathology, including any type of pre-gestational diabetes, lupus, heart disease, substance  
9 abuse, hypothyroidism, epilepsy, leukaemia, bulimia, anorexia, depressive disorder,  
10 autoimmune cirrhosis, asthma, and multiple sclerosis. Adolescent women with pre-gestational  
11 diabetes (type 1 or 2) or GDM were referred from level-one or level-two attention centres to our  
12 institution and OGTT was avoided in this population.  
13  
14  
15  
16  
17  
18  
19  
20  
21  
22  
23  
24

## 25 **Procedure**

26  
27  
28 First, we identified adolescent women who delivered during the study period from the electronic  
29 register of births. After that we reviewed each non-electronic clinical record to check if the  
30 adolescent women had received an OGTT and in which week of gestation the test was  
31 performed. We selected pregnant adolescent women with OGTT between 11 and 35 weeks of  
32 gestation and if the inclusion criteria were fulfilled then the maternal and neonatal clinical  
33 records were requested to obtain data for analysis. Glucose was measured using the Vitros  
34 DT60 II chemistry system (OrthoClinical Diagnostics, Tilburg, The Netherlands), which has a  
35 sensitivity of 20 mg/dL (1.11 mmol/L) and a coefficient of variation of 1.4–1.8% according to the  
36 manufacturer's instructions. The laboratory fulfils the Official Mexican Norm, NOM-007-SSA3-  
37 2011, for the organization and functioning of clinical laboratories in Mexico and is certified by the  
38 Global Certification Bureau for quality management systems in concordance with the ISO  
39 9001:2015 norm. Gestational age was calculated from the last menstrual period; if women were  
40 unaware of when their last menstrual period was, or if the date was not reliable, we used the first  
41 trimester ultrasound measurement. In our institution GDM is diagnosed based on the  
42  
43  
44  
45  
46  
47  
48  
49  
50  
51  
52  
53  
54  
55  
56  
57  
58  
59  
60

1  
2  
3 observation of two or more abnormal values during a 75-g/2-h OGTT: fasting  $\geq 95$  mg/dL (5.3  
4 mmol/L), 1-h  $\geq 180$  mg/dL (10 mmol/L), and 2-h  $\geq 155$  mg/dL (8.6 mmol/L), according to  
5 recommendations from the Fifth International Workshop-Conference on Gestational Diabetes  
6 Mellitus. [21] A single abnormal value was not considered sufficient for GDM diagnosis, and  
7 women who exhibited one such value did not receive GDM-specific treatment. Women with two  
8 or more abnormal glucose values during OGTT received medical nutrition therapy (MNT) and  
9 subsequent evaluation of glycaemic control at intervals of 2–4 weeks. For women who did not  
10 achieve glycaemic control with MNT, metformin was added at doses of 1500–2550 mg and/or  
11 insulin therapy (0.3–1.0 U/kg of body weight) in order to achieve goals for capillary glucose (self-  
12 monitoring): fasting  $< 95$  mg/dL (5.3 mmol/L) and 1-h postprandial  $< 140$  mg/dL (7.8 mmol/L).

### 24 25 **Study variables**

26  
27  
28 Fasting glucose was determined as part of the 75-g/2-h OGTT, and a receiver operating  
29 characteristic (ROC) curve and Youden's index was used to establish the cut-offs. The glucose  
30 values during the OGTTs were re-analysed according to IADPSG criteria, and GDM diagnosis  
31 was defined as one or more abnormal glucose values: fasting  $\geq 92$  mg/dL (5.1 mmol/L), 1-h  $\geq 180$   
32 mg/dL (10 mmol/L), and 2-h  $\geq 153$  mg/dL (8.5 mmol/L). [12]

33  
34  
35 We also explored perinatal outcomes between women with and without GDM, for this analysis  
36 we included only GDM women without treatment. Large for gestational age was defined as a  
37 birth weight above the 90<sup>th</sup> percentile for sex and gestational age for Mexican people [22], and  
38 small for gestational age was defined as a birth weight below the 10<sup>th</sup> percentile for sex and  
39 gestational age for Mexican people. [22] Preeclampsia was defined as having a blood pressure  
40 of  $\geq 140/90$  mmHg, and proteinuria was defined as having a blood pressure of  $> 300$  mg/24 h. In  
41 the absence of proteinuria, we considered a diagnosis of preeclampsia based on a blood  
42 pressure of  $\geq 140/90$  mmHg and one or more of the following severity criteria outlined by the  
43 ACOG: thrombocytopenia, abnormal liver function, recent development of renal failure,  
44  
45  
46  
47  
48  
49  
50  
51  
52  
53  
54  
55  
56  
57

1  
2  
3 pulmonary oedema or brain or visual disturbances. [23] Gestational hypertension was defined as  
4 having a blood pressure of  $\geq 140/90$  mmHg after 20 weeks of gestation in the absence of  
5 proteinuria and severity criteria. [23] Intrauterine growth restriction was defined as the presence  
6 of an estimated foetal weight below the third percentile. [24] Polyhydramnios was defined by an  
7 amniotic fluid index of  $>18$  cm. [25] Preterm birth was defined as birth after 20 and before 37  
8 weeks of gestation. [26] Maternal overweight was defined as a BMI for age that was greater than  
9 a +1 Z-score, and obesity was defined as a BMI for age greater than a +2 Z-score based on the  
10 WHO references. [27]

### 21 **Sample size**

22  
23 The sample size was calculated using recommendations for sample size estimation in diagnostic  
24 test studies. [28] In order to find a 90% fasting glucose sensitivity for GDM screening,  
25 considering a prevalence of GDM of 6% and a maximum marginal error of 15% with a 95%  
26 confidence level, a sample size of 345 participants was required. We decided to include all  
27 adolescent pregnant women who fulfil the inclusion criteria during the period of study.

### 35 **Statistical Analysis**

36  
37 We used the Statistical Package for Social Science Software to conduct data analysis (SPSS  
38 15, Chicago, IL, USA). Continuous variables were expressed as the mean  $\pm$  standard deviation,  
39 and categorical variables were expressed as frequencies and proportions. Student's t- or Mann-  
40 Whitney U-tests were used to compare continuous variables according to the variable  
41 distribution, and the chi-square test or Fisher's exact test was used to evaluate differences in  
42 proportions. Statistical significance was considered if  $p \leq 0.05$ . Contingency tables were  
43 determined to calculate the sensitivity, specificity, positive predictive value (PPV), negative  
44 predictive value (NPV), positive likelihood ratio (LR +), and negative (LR-) with 95% confidence  
45 intervals (CI) using different cut-off points that were determined based on the ROC curve and  
46  
47  
48  
49  
50  
51  
52  
53  
54  
55  
56  
57  
58  
59  
60

1  
2  
3 Youden's index. The difference in the risk of adverse perinatal outcomes between adolescents  
4 with and without GDM was determined by calculating the odds ratio (OR) with a 95% CI.  
5  
6  
7  
8  
9

## 10 11 **RESULTS**

12  
13  
14 During the study period, there were 11,618 births at our institution of which 2,122 occurred in  
15 adolescent women. In total 1,315 pregnant adolescent women had received a 75-g/2-h OGTT.  
16  
17 Of these women 1,061 met the inclusion criteria and 254 were excluded because of incomplete  
18 clinical records (n=105), twin pregnancies (n=13), incomplete OGTT (n=11), pregestational  
19 diabetes (n=2) and some additional pathology (n=123).  
20  
21  
22  
23

24  
25 Most adolescent women who do not receive OGTT only received attention for hospitalization or  
26 delivery from various causes including: preterm labor, premature rupture of membranes,  
27 preeclampsia and labor in active phase. During the study period 32 pregnant adolescent women  
28 were referred to our institution with a previous diagnosis of some type of diabetes and had not  
29 received an OGTT, 19 adolescents with pre-gestational diabetes (8 with type 1 diabetes and 9  
30 with type 2 diabetes), and 13 with GDM.  
31  
32  
33  
34  
35  
36  
37

38  
39 Seventy-one women were diagnosed with GDM, corresponding to a prevalence of 6.7% (CI 95%  
40 5.3-8.4). The baseline data of adolescents with and without GDM collected upon study  
41 enrolment are listed in Table 1. Adolescents with GDM had higher weight and body mass index  
42 than adolescents without GDM. Prevalence of obesity was higher among GDM women  
43 compared to adolescents without GDM, (p=0.001). Among the 71 adolescents with GDM  
44 diagnosed according to IADPSG criteria, the frequencies of abnormal glucose values during the  
45 75-g/2-h OGTT were as follows: fasting, 64 (90.1%); 1-h, 5 (7.0%), and 2-h, 7 (9.9%). Only, one  
46 adolescent had three abnormal glucose values and three adolescents had two abnormal  
47 glucose values.  
48  
49  
50  
51  
52  
53  
54  
55  
56  
57  
58  
59  
60

**Table 1. Characteristics of 1061 adolescent women at study admission.**

| Characteristics                               | Total adolescents<br>n=1061 | Adolescents without GDM<br>n=990 | Adolescents with GDM<br>n=71 | p*     |
|-----------------------------------------------|-----------------------------|----------------------------------|------------------------------|--------|
| Age (years)                                   | 16.1 ± 1.6                  | 16.1 ± 1.5                       | 16.2 ± 1.6                   | 0.51   |
| Weight (Kg)                                   | 59.1 ± 10.0                 | 58.7 ± 9.8                       | 63.9 ± 11.5                  | 0.0001 |
| Height (m)                                    | 1.56 ± 0.05                 | 1.56 ± 0.05                      | 1.56 ± 0.05                  | 0.69   |
| Body mass index (Kg/m <sup>2</sup> )          | 24.3 ± 3.6                  | 24.1 ± 3.5                       | 26.2 ± 4.1                   | 0.0001 |
| Gestational age at 75-<br>g/2-h OGTT (Weeks)  | 25.0 ± 4.4                  | 24.1 ± 3.5                       | 26.1 ± 4.1                   | 0.008  |
| Glucose (mg/dL)                               |                             |                                  |                              |        |
| Fasting                                       | 80.2 ± 7.3                  | 79.2 ± 6.2                       | 94.4 ± 6.2                   | 0.0001 |
| 1 h                                           | 105.2 ± 25.7                | 103.6 ± 24.6                     | 127.9 ± 29.5                 | 0.0001 |
| 2 h                                           | 97.9 ± 19.4                 | 96.6 ± 18.4                      | 114 ± 24.4                   | 0.0001 |
| Number of pregnancies                         |                             |                                  |                              |        |
| 1                                             | 923 (86.9)                  | 865 (87.3)                       | 58 (81.7)                    | 0.08   |
| 2                                             | 121 (11.4)                  | 110 (11.1)                       | 11 (15.5)                    | 0.17   |
| 3 or more                                     | 18 (1.7)                    | 16 (1.6)                         | 2 (2.8)                      | 0.61   |
| Normal weight                                 | 582 (55.6)                  | 559 (57.3)                       | 23 (32.4)                    | 0.001  |
| Overweight                                    | 357 (34.1)                  | 324 (33.2)                       | 33 (46.5)                    | 0.01   |
| Obesity                                       | 92 (8.8)                    | 77 (7.9)                         | 15 (21.1)                    | 0.001  |
| First-degree relative with<br>type 2 diabetes | 157 (14.8)                  | 140 (14.1)                       | 17(23.9)                     | 0.0.2  |

Value expressed as mean ± standard deviation and/or frequency and (percentage).

\*Student t or Chi square test.

1  
2  
3 Figure 1 shows the ROC curve. The area under the curve was 0.96 (95% CI 0.93-0.99) with p=  
4 0.0001. Table 2 shows the results of the characterization of the five fasting glucose cut-offs—75,  
5 80, 85, 90, and 92 mg/dL (4.2, 4.5, 4.7, 5.0 and 5.1 mmol/L, respectively)—for GDM screening.  
6  
7 We decided to choose five cut-off points for fasting glucose, based on Youden’s index, and to  
8 round the cut-off points up to the nearest integer (mg/dL). The best cut-off for fasting glucose  
9 according to Youden’s index was 90mg/dL. Using a cut-off of 85 mg/dL (4.72 mmol/L), a total of  
10 275 (26%) OGTTs would be necessary, whereas only 95 (8.9%) would be required with a  
11 cut-off of 90 mg/dL (5.0 mmol/L).  
12  
13  
14  
15  
16  
17  
18  
19  
20  
21  
22  
23  
24  
25  
26  
27  
28  
29  
30  
31  
32  
33  
34  
35  
36  
37  
38  
39  
40  
41  
42  
43  
44  
45  
46  
47  
48  
49  
50  
51  
52  
53  
54  
55  
56  
57  
58  
59  
60

**Figure 1. Receiver operating characteristic curve shows area under the curve of 0.96**

**Table 2. Gestational diabetes mellitus screening capacity among Mexican adolescents with different fasting glucose cut-offs.**

| <b>Fasting Glucose Cut-off</b> | <b>Sensitivity % (95% CI)</b> | <b>Specificity % (95% CI)</b> | <b>PPV % (95% CI)</b> | <b>NPV % (95% CI)</b> | <b>LR+ (95% CI)</b> | <b>LR- (95% CI)</b> | <b>OGTT for perform</b> |
|--------------------------------|-------------------------------|-------------------------------|-----------------------|-----------------------|---------------------|---------------------|-------------------------|
| 75 mg/dL<br>(4.2 mmol/L)       | 98.5<br>(92-99)               | 22.4<br>(20-25)               | 7.9<br>(6-10)         | 99.6<br>(97-99.9)     | 1.3<br>(1.2-1.3)    | 0.06<br>(0.01-0.46) | 834<br>(79%)            |
| 80 mg/dL<br>(4.5 mmol/L)       | 97<br>(89-99)                 | 50.1<br>(47-53)               | 11.6<br>(9-15)        | 99.6<br>(98.5-99.9)   | 1.9<br>(1.8-2.1)    | 0.06<br>(0.02-0.23) | 559<br>(52.9%)          |
| 85 mg/dL<br>(4.7 mmol/L)       | 94<br>(86-97)                 | 78.6<br>(76-81)               | 22.9<br>(18-28)       | 99.5<br>(98-99.8)     | 4.3<br>(3.8-5.0)    | 0.07<br>(0.03-0.19) | 275<br>(26%)            |
| 90 mg/dL<br>(5.0 mmol/L)       | 91<br>(82-95)                 | 96.6<br>(95-97)               | 64.2<br>(54-73)       | 99.4<br>(98.6-99.7)   | 26.7<br>(18.8-37.1) | 0.09<br>(0.04-0.19) | 95<br>(8.9%)            |
| 92 mg/dL<br>(5.1 mmol/L)       | 88.4<br>(78-94)               | 99.9<br>(99-100)              | 99.2<br>(91-99)       | 99.2<br>(98-99)       | 884<br>(123-6231)   | 0.12<br>(0.06-0.22) | 60<br>(5.7%)            |

**PPV= Predictive positive value, NPV= Negative predictive value, LR = Likelihood ratio, OGTT: Oral glucose tolerance test.**

We observed no differences in perinatal outcomes among Mexican adolescent women with GDM without treatment and adolescent women without GDM, such as intrauterine growth restriction, polyhydramnios, gestational hypertension, preeclampsia, preterm birth, premature rupture of membranes, caesarean section, obstetric haemorrhage, large for gestational age, small for gestational age, and congenital malformations (Table 3). However, we did observe a higher incidence of neonates that were small for gestational age in adolescents without GDM. We excluded of this analysis four GDM women that received specific treatment for GDM, three with MNT and one with MNT plus metformin.

**Table 3. Risk of adverse perinatal outcomes among Mexican adolescent women with GDM diagnosed by IADPSG criteria without treatment.**

| <b>Adverse perinatal outcomes</b> | <b>Total<br/>n=1057</b> | <b>Without GDM<br/>n=990<br/>n (%)</b> | <b>With GDM<br/>n=67<br/>n (%)</b> | <b>Odds ratio<br/>(95% CI)</b> | <b>p</b> |
|-----------------------------------|-------------------------|----------------------------------------|------------------------------------|--------------------------------|----------|
| Intrauterine growth restriction   | 36 (3.4)                | 35 (3.5)                               | 1 (1.5)                            | 0.41<br>(0.06–3.1)             | 0.37     |
| Polyhydramnios                    | 13 (1.2)                | 12 (1.2)                               | 1 (1.5)                            | 1.2<br>(0.41 – 3.4)            | 0.84     |
| Gestational hypertension          | 54 (5.1)                | 50 (5.1)                               | 4 (6.0)                            | 1.2<br>(0.28–5.5)              | 0.74     |
| Preeclampsia                      | 52 (4.9)                | 49 (4.9)                               | 3 (4.5)                            | 0.9<br>(0.27 – 2.9)            | 0.86     |
| Preterm birth                     | 140 (13.3)              | 130 (13.1)                             | 10 (14.9)                          | 1.15<br>(0.57 – 2.3)           | 0.67     |
| Premature rupture of membranes    | 15 (1.4)                | 13 (1.3)                               | 2 (3.0)                            | 2.3<br>(0.51–20.5)             | 0.26     |
| Caesarean section                 | 542 (51.3)              | 505 (51)                               | 37 (55.2)                          | 1.18<br>(0.72–1.95)            | 0.50     |
| Obstetric haemorrhage             | 28 (2.6)                | 26 (2.6)                               | 2 (3.0)                            | 1.14<br>(0.26–4.9)             | 0.86     |
| Neonate large for gestational age | 33 (3.1)                | 32 (3.3)                               | 1 (1.5)                            | 0.45<br>(0.06 – 3.3)           | 0.42     |
| Neonate small for gestational age | 122 (11.6)              | 117 (11.2)                             | 5 (7.5)                            | 0.59<br>(0.23 – 1.5)           | 0.27     |
| Congenital malformations          | 28 (2.6)                | 28 (2.6)                               | 2 (3.0)                            | 1.14<br>(0.26–4.9)             | 0.86     |



## DISCUSSION

Our study shows that a fasting glucose cut-off of  $\geq 90$  mg/dL (5.0 mmol/L) exhibited good sensitivity and specificity for GDM screening in Mexican adolescents. Thus, using this cut-off improved the ability to identify healthy patients and, thus, reduced the need to perform an OGTT to confirm or exclude the diagnosis of GDM, resulting in similar detection rates. This study is the first to report the prevalence of GDM using IADPSG criteria in adolescent population and to describe perinatal outcomes in GDM adolescent women without treatment.

Fasting glucose was altered in 90.1% of the GDM cases (n=64), but only 7% and 9.9% had altered glucose values at 1-h and 2-h during the 75-g/2-h OGTT, respectively. Therefore, in this population, fasting glucose can be used as a screening tool for GDM. Although the possibility of using fasting glucose as a screening strategy has been reported in previous studies in adult women, [20,29] no studies have attempted to use IADPSG criteria to diagnose GDM in adolescent women. The first unbiased study to suggest this diagnostic strategy was published in 1998 by Reichelt et al., who reported a sensitivity of 94% and a specificity of 66% using a fasting glucose cut-off of  $\geq 85$  mg/dL (4.72 mmol/dL) in adult Brazilian women. [30] A meta-analysis conducted by Donovan et al. reported seven studies in which fasting glucose was used for GDM screening. However, all of these studies utilized Carpenter and Counstan's criteria to diagnose GDM. In their work, fasting glucose cut-offs of  $\geq 85$  mg/dL (4.72 mmol/L) and  $\geq 95$  mg/dL (5.27 mmol/L) resulted in sensitivity and specificity values of 87% and 52% and 54% and 93%, respectively. [20]

In 2010, Agarwal et al. published a study of 10,283 pregnant women (maternal age:  $28.3 \pm 6.1$  years) from the United Arab Emirates. Using the IADPSG criteria, these authors reported that fasting glucose cut-offs of 75 mg/dL (4.16 mmol/L), 85 mg/dL (4.72 mmol/L), and 92 mg/dL (5.11 mmol/L) resulted in the sensitivity and specificity values of 98.3% and 11.3%, 88.9 and 60%, and 76.8% and 100%, respectively, for GDM screening. [19] Although these populations are not

1  
2  
3 comparable, the sensitivity and specificity found in our study using glucose cut-offs of 85 and 90  
4 mg/dL (4.72 and 5.0 mmol/L) in Mexican adolescents were higher. In our study, the abnormal  
5 fasting glucose rate was higher than that of the HAPO study for diagnosis of GDM, in which the  
6 higher rate was 74% for women from Barbados and 73% for women from Bellflower, CA. [31]  
7 This discrepancy could be explained by maternal age and ethnic group; in our study, the mean  
8 of maternal age was  $16.2 \pm 1.6$  while in the HAPO study the mean of maternal age was  $29.2 \pm$   
9 5.8. Gopalakrishnan et al. reported that 91.4% of adult North Indian women with GDM  
10 according to IADPSG criteria had abnormal fasting plasma glucose, which is similar to our  
11 findings. [32] Likewise, Trujillo et al. reported in adult Brazilian women an AUC of 0.96 for fasting  
12 glucose values to detect GDM as defined by the IADPSG diagnostic criteria. In the same study,  
13 using a fasting plasma glucose cut-off value of 85 mg/dL indicated that only 18.7% of all women  
14 needed to undergo an OGTT with a detection rate of 92.5% of all GDM cases while the 90 mg/dl  
15 cutoff had a detection rate of 88.3% cases of GDM and an OGTT could be necessary in only  
16 4.2% of all women. [33] These findings are similar to those of our study. If our results are  
17 confirmed, the OGTT could be avoided in Mexican adolescent women because 90.1% of GDM  
18 women can be diagnosed using fasting glucose in accordance with IADPSG criteria.

19  
20  
21  
22  
23  
24  
25  
26  
27  
28  
29  
30  
31  
32  
33  
34  
35  
36  
37  
38  
39  
40  
41  
42  
43  
44  
45  
46  
47  
48  
49  
50  
51  
52  
53  
54  
55  
56  
57  
58  
59  
60  
The prevalence of GDM in adolescent women at our institution increased significantly from 0.4%  
using current criteria to 6.7% using IADPSG criteria, however 38% of pregnant adolescent  
attended at our institution during the study period did not have GDM screening in clinical records  
because they only arrived for delivery.

The perinatal outcomes in our study were similar in adolescents with and without GDM even  
though 94.3% of the adolescents with GDM did not receive GDM-specific treatment. This finding  
was consistent with the cost-benefit analysis reported by Werner et al., who concluded that the  
perinatal benefits associated with use of the IADPSG criteria do not justify the additional cost  
associated with increasing the number of women diagnosed with GDM three-fold. [34] However,

1  
2  
3 using the IADPSG criteria could be beneficial because this is a young and vulnerable group—  
4 thus, if their conversion rate to type 2 diabetes is the same as what has been shown in different  
5 systematic review and meta-analysis, [35,36] they would likely develop type 2 diabetes at a very  
6 young age and an opportune intervention could reduce the long-term incidence of type 2  
7 diabetes. A recent systematic review indicates that intervention addressing health behaviour in  
8 women with previous GDM starting up till one year postpartum is superior to no intervention with  
9 regard to T2DM prevention. [37] Also, these women are likely to have subsequent pregnancies  
10 and recurrent GDM. [38]

11  
12 The limitations of our study are as follows: the study was retrospective: the diagnostic validity of  
13 the test has not been yet confirmed in a second independent population; and the results are only  
14 applicable to Mexican, and, potentially, Latin, adolescent women. Future prospective and  
15 multicentre studies are required to corroborate our findings. Another limitation was that the  
16 sample size for comparing perinatal outcomes between women with and without GDM was  
17 insufficient, and future studies with appropriated power are needed to corroborate our results.

18  
19 Most adolescent women in our institution request prenatal care in the middle of the second  
20 trimester that is similar to previous study by Lira-Plascencia et al., who reported that the mean  
21 gestational age on the first prenatal visit among the 2,315 pregnant in our institution was  $24.2 \pm$   
22  $6.7$  weeks of gestation. [39] It is important to point out that we found two adolescents with overt  
23 diabetes (type 2 diabetes) in early pregnancy that were excluded of analysis, this is consistent  
24 with the reported trends in the prevalence of type 1 and type 2 diabetes that increased from 0.96  
25 to 1.29 and 0.45 to 0.79 per 1000, respectively, among the Hispanic youth population between  
26 2001 and 2009. [40]

27  
28 According to the IADPSG, [12] the ADA, [2] the Endocrine Society, [12] the WHO, [14] the FIGO,  
29 [15] the ACOG, [16] the NICHD, [18] and the Society of Obstetricians and Gynaecologists of  
30 Canada, [3] all adolescents should be screening for GDM between 24 and 28 weeks of

1  
2  
3 gestation. This intervention has an impact on the cost of prenatal care in the health systems of  
4  
5 low and middle-income countries including Mexico regardless of the low prevalence of GDM in  
6  
7 adolescents compared with the adult population and the lack of evidence about the beneficial of  
8  
9 treatment on perinatal outcomes using IADPSG criteria. On the other hand, the diagnosis of  
10  
11 GDM in adolescents along with an appropriate intervention program could decrease the  
12  
13 prevalence of type 2 diabetes in the young population in the long term.  
14  
15

16  
17 Future research should corroborate the use of fasting glucose as a screening tool to identify  
18  
19 candidates for OGTT, the benefit of treating GDM in adolescent women, the prevalence of type  
20  
21 2 diabetes during the first trimester of pregnancy, and the risk of type 2 diabetes in GDM  
22  
23 adolescent women in the long term.  
24  
25

## 26 **CONCLUSIONS**

27  
28 A fasting glucose of  $\geq 90$  mg/dL (5.0 mmol/L) could be a useful cut-off for GDM screening in  
29  
30 Mexican adolescents, as it provides adequate sensitivity and specificity and a good detection  
31  
32 rate. Additionally, implementing this strategy decreases costs compared to the universal  
33  
34 application of one-step OGTT-based screening. More studies are necessary to evaluate the  
35  
36 effect of GDM on perinatal outcomes among adolescent women.  
37  
38  
39

40 **Funding statement:** This work was supported by National Council of Science and Technology,  
41  
42 CONACYT, Mexico (Grant: 233634) and Instituto National de Perinatología Isidro Espinosa de  
43  
44 los Reyes, Mexico City (Registry ID: 212250-42081)  
45  
46

47 **Competing interests:** All authors have completed the ICMJE uniform disclosure form at  
48  
49 [www.icmje.org/coi\\_disclosure.pdf](http://www.icmje.org/coi_disclosure.pdf) and declare: No support from any organization for the  
50  
51 submitted work; no financial relationships with any organizations that might have an interest in  
52  
53 the submitted work in the previous three years; no other relationships or activities that could  
54  
55 appear to have influenced the submitted work.  
56  
57  
58

**Authors' contributions:** ERM, NSO and JLP, conceived and designed the study, analysed the data, and wrote the paper. NMC, LAS, COG and GEG, analysed the data, and reviewed the paper. NSO, CRM, and ART acquired the data, interpreted the results and reviewed the paper.

**Data sharing statement:** All relevant data are within the paper. No additional data are available.

## References

1. World Health Organization. Adolescent pregnancy. Available at [http://www.who.int/maternal\\_child\\_adolescent/topics/maternal/adolescent\\_pregnancy/en/](http://www.who.int/maternal_child_adolescent/topics/maternal/adolescent_pregnancy/en/) (Consulted January 18, 2017).
2. American Diabetes Association. Classification and diagnosis of diabetes. *Diabetes Care*. 2015;38:S8–S16.
3. Fleming N, O'Driscoll T, Becker G, Spitzer RF. CANPAGO Committee, Society of Obstetricians and Gynaecologists of Canada. Adolescent pregnancy guidelines. *J Obstet Gynaecol Can*. 2015;37:740–59.
4. Khine ML, Winklestein A, Copel JA. Selective screening for gestational diabetes mellitus in adolescent pregnancies. *Obstet Gynecol*. 1999;93:738–42.
5. Ramírez-Torres MA, Rodríguez-Pezino J, Zambrana-Castañeda M, Lira-Plascencia J, Parra A. Gestational diabetes mellitus and glucose intolerance among Mexican pregnant adolescents. *J Pediatr Endocrinol Metab*. 2003;16:401–5.
6. Carpenter MW, Coustan DR. Criteria for screening tests for gestational diabetes. *Am J Obstet Gynecol*. 1982;144:768–73.
7. Reyes-Muñoz E, Parra A, Castillo-Mora A, Ortega-González C. Effect of the diagnostic criteria of the International Association of Diabetes and Pregnancy Study Groups on the prevalence of gestational diabetes mellitus in urban Mexican women: a cross-sectional study. *Endocr Pract*. 2012;18:146–51.

- 1  
2  
3 8. Minjares-Granillo RO, Reza-López SA, Caballero-Valdez S, Levario-Carrillo M, Chávez-Corral  
4 DV. Maternal and perinatal outcomes among adolescents and mature women: a hospital-based  
5 study in the north of Mexico. *J Pediatr Adolesc Gynecol*. 2016;29:304–11,  
6  
7  
8
- 9 9. Lira-Plascencia J, Oviedo-Cruz H, Pereira LA, Dib-Schekaiban C, Grosso-Espinoza JM,  
10 Ibarguengoitia-Ochoa F, et al. Analysis of the perinatal results of the first five years of the  
11 functioning of a clinic for pregnant teenagers. *Ginecol Obstet Mex*. 2006;74:241–6.  
12  
13
- 14 10. Ortiz-Hernández L, Gómez-Tello BL. Food consumption in Mexican adolescents. *Rev*  
15 *Panam Salud Publica*. 2008;24:127-35  
16  
17
- 18 11. HAPO Study Cooperative Research Group, Metzger BE, Lowe LP, Dyer AR, Trimble ER,  
19 Chaovarindr U, et al, Hyperglycemia and adverse pregnancy outcomes. *N Engl J Med*.  
20 2008;358:1991–2002.  
21  
22
- 23 12. International Association of Diabetes and Pregnancy Study Groups Consensus Panel,  
24 Metzger BE, Gabbe SG, Persson B, Buchanan TA, Catalano PA, et al. International Association  
25 of Diabetes and Pregnancy Study Groups recommendations on the diagnosis and classification  
26 of hyperglycemia in pregnancy. *Diabetes Care*. 2010;33:676–82.  
27  
28
- 29 13. Blumer I, Hadar E, Hadden DR, Jovanović L, Mestman JH, Murad MH, et al. Diabetes and  
30 pregnancy: an endocrine society clinical practice guideline. *J Clin Endocrinol Metab*.  
31 2013;98:4227–49.  
32  
33
- 34 14. World Health Organization. Diagnostic criteria and classification of hyperglycaemia first  
35 detected in pregnancy. WHO/NMH/MND/13.2, Geneva: WHO Press; 2013.  
36  
37
- 38 15. Hod M, Kapur A, Sacks DA, Hadar E, Agarwal M, Di Renzo GC, et al. The International  
39 Federation of Gynaecology and Obstetrics (FIGO) initiative on gestational diabetes mellitus: A  
40 pragmatic guide for diagnosis, management, and care. *Int J Gynaecol Obstet*. 2015;131:S173–  
41 211.  
42  
43  
44  
45  
46  
47  
48  
49  
50  
51  
52  
53  
54  
55  
56  
57  
58  
59  
60

16. American Congress of Obstetricians and Gynecologists. Committee on Practice Bulletins-Obstetrics. Practice Bulletin No. 137: Gestational diabetes mellitus. *Obstet Gynecol*. 2013;122:406–16.
17. Vandorsten JP, Dodson WC, Espeland MA, Grobman WA, Guise JM, Mercer BM, et al. NIH consensus development conference: diagnosing gestational diabetes mellitus. *NIH Consens State Sci Statements*. 2013;29:1–31.
18. National Institute for Health and Care Excellence. Diabetes in pregnancy: management of diabetes and its complications from preconception to the postnatal period. Clinical guidelines. London: National Collaborating Centre for Women's and Children's Health (UK); 2015.
19. Agarwal MM, Dhatt GS, Shah SM. Simplifying the International Association of Diabetes and Pregnancy diagnostic algorithm using fasting plasma glucose. *Diabetes Care*. 2010;33:2018–20.
20. Donovan L, Hartling L, Muise M, Guthrie A, Vandermeer B, Dryden DM. Screening tests for gestational diabetes: a systematic review for the U.S. Preventive Services Task Force. *Ann Intern Med*. 2013;159:115–22.
21. Metzger BE, Buchanan TA, Coustan DR, De Leiva A, Dunger DB, Hadden DR, et al. Summary and Recommendations of the Fifth International Workshop-Conference on Gestational Diabetes Mellitus. *Diabetes Care*. 2007; 30: 251–60.
22. Flores-Huerta S, Martínez-Salgado H. Birth weight of male and female infants born in hospitals affiliated with the Instituto Mexicano del Seguro Social. *Bol Med Hosp Infant Mex*. 2012;69:30–9.
23. American College of Obstetricians and Gynecologists; Task Force on Hypertension in Pregnancy. Hypertension in pregnancy. Report of the American College of Obstetricians and Gynecologists' Task Force on Hypertension in Pregnancy. *Obstet Gynecol*. 2013;122:1122–31.
24. Figueras F, Gratacós E. Update on the diagnosis and classification of fetal growth restriction and proposal of a stage-based management protocol. *Fetal Diagn Ther*. 2014;36:86–98.

- 1  
2  
3 25. Petrozella L, Dashe J, McIntire D, Leveno K. Clinical significance of borderline amniotic fluid  
4 index and oligohydramnios in preterm pregnancy. *Obstet Gynecol.* 2011;117:338–42.  
5  
6  
7 26. American College of Obstetricians and Gynecologists; Committee on Practice Bulletins–  
8 Obstetrics. ACOG practice bulletin no. 127: Management of preterm labor. *Obstet Gynecol.*  
9 2012;119:1308–17.  
10  
11  
12  
13 27. de Onis M, Onyango AW, Borghi E, Siyam A, Nishida C, Siekmann J. Development of a  
14 WHO growth reference for school-aged children and adolescents. *Bull World Health Organ.*  
15 2007;85:660–7.  
16  
17  
18  
19 28. Hajian-Tilaki K. Sample size estimation in diagnostic test studies of biomedical informatics. *J*  
20 *Biomed Inform.* 2014;48:193–204.  
21  
22  
23  
24 29. Agarwal MM. Gestational diabetes mellitus: Screening with fasting plasma glucose. *World J*  
25 *Diabetes.* 2016;7:279–89.  
26  
27  
28 30. Reichelt A, Spichler E, Branchtein L, Nucci L, Laercio F, Schmidt MI. Fasting plasma  
29 glucose is a useful test for the detection of gestational diabetes. *Diabetes Care.* 1998;21:1246–  
30  
31  
32 9.  
33  
34  
35 31. Sacks DA, Hadden DR, Maresh M, Deerochanawong C, Dyer AR, Metzger BE, et al.  
36 Frequency of gestational diabetes mellitus at collaborating centers based on IADPSG  
37 consensus panel-recommended criteria: the Hyperglycemia and Adverse Pregnancy Outcome  
38 (HAPO) Study. *Diabetes Care.* 2012;35:526–8.  
39  
40  
41  
42  
43 32. Gopalakrishnan V, Singh R, Pradeep Y, Kapoor D, Rani AK, Pradhan S, et al. Evaluation of  
44 the prevalence of gestational diabetes mellitus in North Indians using the International  
45 Association of Diabetes and Pregnancy Study groups (IADPSG) criteria. *J Postgrad Med.*  
46 2015;61:155–8.  
47  
48  
49  
50  
51 33. Trujillo J, Vigo A, Reichelt A, Duncan BB, Schmidt MI. Fasting plasma glucose to avoid a full  
52 OGTT in the diagnosis of gestational diabetes. *Diabetes Res Clin Pract.* 2014;105:322–6.  
53  
54  
55  
56 34. Werner EF, Pettker CM, Zuckerwise L, Reel M, Funai EF, Henderson J, et al. Screening for  
57  
58  
59



1  
2  
3 gestational diabetes mellitus: are the criteria proposed by the International Association of the  
4 Diabetes and Pregnancy Study Groups cost-effective? *Diabetes Care*. 2012;35:529–35.

5  
6  
7 35. Bellamy L, Casas JP, Hingorani AD, Williams D. Type 2 diabetes mellitus after gestational  
8 diabetes: a systematic review and meta-analysis. *Lancet*. 2009;373:1773-9.

9  
10  
11 36. Rayanagoudar G, Hashi AA, Zamora J, Khan KS, Hitman GA, Thangaratinam S.  
12 Quantification of the type 2 diabetes risk in women with gestational diabetes: a systematic  
13 review and meta-analysis of 95,750 women. *Diabetologia*. 2016;59:1403-11.]

14  
15  
16 37. Pedersen ALW, Terkildsen Maindal H, Juul L. How to prevent type 2 diabetes in women with  
17 previous gestational diabetes? A systematic review of behavioural interventions. *Prim Care*  
18 *Diabetes*. 2017. doi: 10.1016/j.pcd.2017.05.002. [Epub ahead of print.]

19  
20  
21 38. Schwartz N, Nachum Z, Green MS. The prevalence of gestational diabetes mellitus  
22 recurrence—effect of ethnicity and parity: a meta-analysis. *Am J Obstet Gynecol*. 2015;213:310-  
23 7.

24  
25  
26 39. Lira-Plascencia J, Oviedo-Cruz H, Pereira LA, Dib-Schekaiban C, Grosso-Espinoza JM,  
27 Ibarguengoitia-Ochoa F, et al. Analysis of the perinatal results of the first five years of the  
28 functioning of a clinic for pregnant teenagers. *Ginecol Obstet Mex*. 2006;74:241–6.

29  
30  
31 40. Dabelea D, Mayer-Davis EJ, Saydah S, Imperatore G, Linder B, Divers J, et al. Prevalence  
32 of type 1 and type 2 diabetes among children and adolescents from 2001 to 2009. *JAMA*.  
33 2014;311:1778–86.

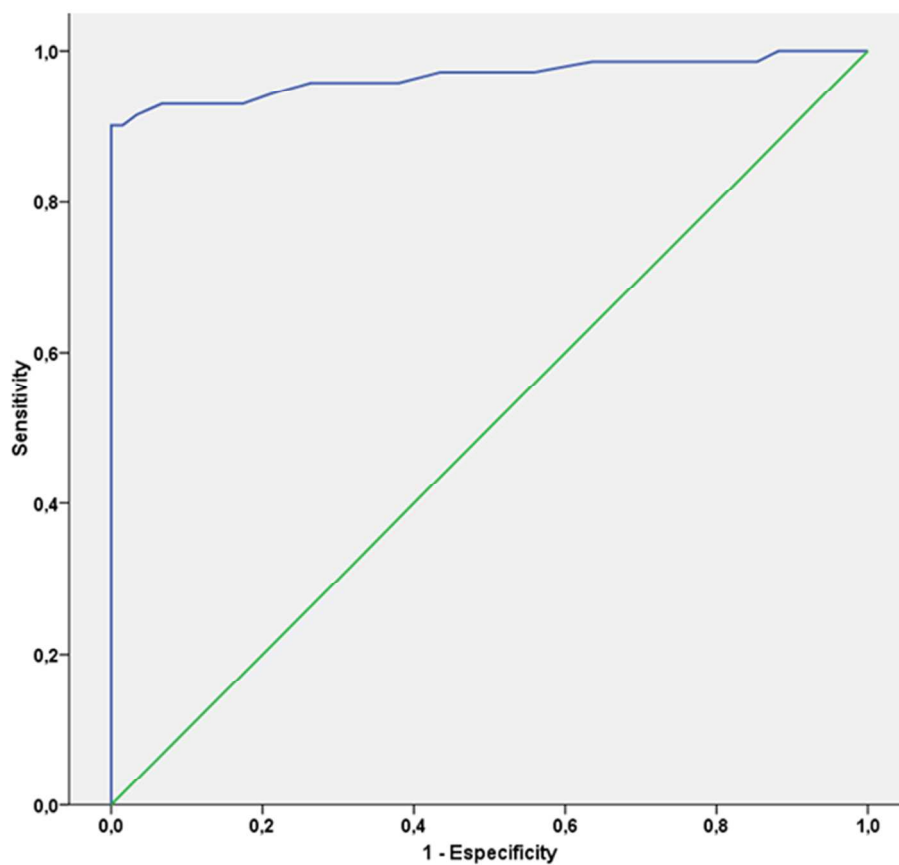

Receiver operating characteristic curve shows area under the curve of 0.96

139x123mm (300 x 300 DPI)

only

| Section & Topic          | No  | Item                                                                                                                                                   | Reported on page # |
|--------------------------|-----|--------------------------------------------------------------------------------------------------------------------------------------------------------|--------------------|
| <b>TITLE OR ABSTRACT</b> |     |                                                                                                                                                        |                    |
|                          | 1   | Identification as a study of diagnostic accuracy using at least one measure of accuracy (such as sensitivity, specificity, predictive values, or AUC)  | Title and page 2   |
| <b>ABSTRACT</b>          |     |                                                                                                                                                        |                    |
|                          | 2   | Structured summary of study design, methods, results, and conclusions (for specific guidance, see STARD for Abstracts)                                 | 2,3                |
| <b>INTRODUCTION</b>      |     |                                                                                                                                                        |                    |
|                          | 3   | Scientific and clinical background, including the intended use and clinical role of the index test                                                     | 4-6                |
|                          | 4   | Study objectives and hypotheses                                                                                                                        | 6                  |
| <b>METHODS</b>           |     |                                                                                                                                                        |                    |
| <i>Study design</i>      | 5   | Whether data collection was planned before the index test and reference standard were performed (prospective study) or after (retrospective study)     | 6,8                |
| <i>Participants</i>      | 6   | Eligibility criteria                                                                                                                                   | 6,7                |
|                          | 7   | On what basis potentially eligible participants were identified (such as symptoms, results from previous tests, inclusion in registry)                 | 7                  |
|                          | 8   | Where and when potentially eligible participants were identified (setting, location and dates)                                                         | 6,7                |
|                          | 9   | Whether participants formed a consecutive, random or convenience series                                                                                | 7                  |
| <i>Test methods</i>      | 10a | Index test, in sufficient detail to allow replication                                                                                                  | 7,8                |
|                          | 10b | Reference standard, in sufficient detail to allow replication                                                                                          | 7,8                |
|                          | 11  | Rationale for choosing the reference standard (if alternatives exist)                                                                                  | 7,8                |
|                          | 12a | Definition of and rationale for test positivity cut-offs or result categories of the index test, distinguishing pre-specified from exploratory         | 8                  |
|                          | 12b | Definition of and rationale for test positivity cut-offs or result categories of the reference standard, distinguishing pre-specified from exploratory | 8                  |
|                          | 13a | Whether clinical information and reference standard results were available to the performers/readers of the index test                                 | 8                  |
|                          | 13b | Whether clinical information and index test results were available to the assessors of the reference standard                                          | 8                  |
| <i>Analysis</i>          | 14  | Methods for estimating or comparing measures of diagnostic accuracy                                                                                    | 9                  |
|                          | 15  | How indeterminate index test or reference standard results were handled                                                                                | 9                  |
|                          | 16  | How missing data on the index test and reference standard were handled                                                                                 | NA                 |
|                          | 17  | Any analyses of variability in diagnostic accuracy, distinguishing pre-specified from exploratory                                                      | 8,9                |
|                          | 18  | Intended sample size and how it was determined                                                                                                         | 9                  |
| <b>RESULTS</b>           |     |                                                                                                                                                        |                    |
| <i>Participants</i>      | 19  | Flow of participants, using a diagram                                                                                                                  | 10                 |
|                          | 20  | Baseline demographic and clinical characteristics of participants                                                                                      | 11                 |
|                          | 21a | Distribution of severity of disease in those with the target condition                                                                                 | 10                 |
|                          | 21b | Distribution of alternative diagnoses in those without the target condition                                                                            | 10                 |
|                          | 22  | Time interval and any clinical interventions between index test and reference standard                                                                 | NA                 |
| <i>Test results</i>      | 23  | Cross tabulation of the index test results (or their distribution) by the results of the reference standard                                            | 12                 |
|                          | 24  | Estimates of diagnostic accuracy and their precision (such as 95% confidence intervals)                                                                | 13                 |
|                          | 25  | Any adverse events from performing the index test or the reference standard                                                                            | NA                 |
| <b>DISCUSSION</b>        |     |                                                                                                                                                        |                    |
|                          | 26  | Study limitations, including sources of potential bias, statistical uncertainty, and generalisability                                                  | 17-18              |
|                          | 27  | Implications for practice, including the intended use and clinical role of the index test                                                              | 15-18              |
| <b>OTHER INFORMATION</b> |     |                                                                                                                                                        |                    |
|                          | 28  | Registration number and name of registry                                                                                                               | 18                 |
|                          | 29  | Where the full study protocol can be accessed                                                                                                          | NA                 |
|                          | 30  | Sources of funding and other support; role of funders                                                                                                  | 18                 |

# STARD 2015

---

## AIM

STARD stands for “Standards for Reporting Diagnostic accuracy studies”. This list of items was developed to contribute to the completeness and transparency of reporting of diagnostic accuracy studies. Authors can use the list to write informative study reports. Editors and peer-reviewers can use it to evaluate whether the information has been included in manuscripts submitted for publication.

---

## EXPLANATION

A **diagnostic accuracy study** evaluates the ability of one or more medical tests to correctly classify study participants as having a **target condition**. This can be a disease, a disease stage, response or benefit from therapy, or an event or condition in the future. A medical test can be an imaging procedure, a laboratory test, elements from history and physical examination, a combination of these, or any other method for collecting information about the current health status of a patient.

The test whose accuracy is evaluated is called **index test**. A study can evaluate the accuracy of one or more index tests. Evaluating the ability of a medical test to correctly classify patients is typically done by comparing the distribution of the index test results with those of the **reference standard**. The reference standard is the best available method for establishing the presence or absence of the target condition. An accuracy study can rely on one or more reference standards.

If test results are categorized as either positive or negative, the cross tabulation of the index test results against those of the reference standard can be used to estimate the **sensitivity** of the index test (the proportion of participants *with* the target condition who have a positive index test), and its **specificity** (the proportion *without* the target condition who have a negative index test). From this cross tabulation (sometimes referred to as the contingency or “2x2” table), several other accuracy statistics can be estimated, such as the positive and negative **predictive values** of the test. Confidence intervals around estimates of accuracy can then be calculated to quantify the statistical **precision** of the measurements.

If the index test results can take more than two values, categorization of test results as positive or negative requires a **test positivity cut-off**. When multiple such cut-offs can be defined, authors can report a receiver operating characteristic (ROC) curve which graphically represents the combination of sensitivity and specificity for each possible test positivity cut-off. The **area under the ROC curve** informs in a single numerical value about the overall diagnostic accuracy of the index test.

The **intended use** of a medical test can be diagnosis, screening, staging, monitoring, surveillance, prediction or prognosis. The **clinical role** of a test explains its position relative to existing tests in the clinical pathway. A replacement test, for example, replaces an existing test. A triage test is used before an existing test; an add-on test is used after an existing test.

Besides diagnostic accuracy, several other outcomes and statistics may be relevant in the evaluation of medical tests. Medical tests can also be used to classify patients for purposes other than diagnosis, such as staging or prognosis. The STARD list was not explicitly developed for these other outcomes, statistics, and study types, although most STARD items would still apply.

---

## DEVELOPMENT

This STARD list was released in 2015. The 30 items were identified by an international expert group of methodologists, researchers, and editors. The guiding principle in the development of STARD was to select items that, when reported, would help readers to judge the potential for bias in the study, to appraise the applicability of the study findings and the validity of conclusions and recommendations. The list represents an update of the first version, which was published in 2003.

More information can be found on <http://www.equator-network.org/reporting-guidelines/stard>.

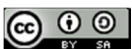

# BMJ Open

## Sensitivity of fasting glucose for gestational diabetes mellitus screening in Mexican adolescents based on International Association of Diabetes and Pregnancy Study Groups criteria: a diagnostic accuracy study based on retrospective data analysis

|                                 |                                                                                                                                                                                                                                                                                                                                                                                                                                                                                                                                                                                                                                                                                                                                                                                                                                                                                                                                                                                                                                                                                                                                            |
|---------------------------------|--------------------------------------------------------------------------------------------------------------------------------------------------------------------------------------------------------------------------------------------------------------------------------------------------------------------------------------------------------------------------------------------------------------------------------------------------------------------------------------------------------------------------------------------------------------------------------------------------------------------------------------------------------------------------------------------------------------------------------------------------------------------------------------------------------------------------------------------------------------------------------------------------------------------------------------------------------------------------------------------------------------------------------------------------------------------------------------------------------------------------------------------|
| Journal:                        | <i>BMJ Open</i>                                                                                                                                                                                                                                                                                                                                                                                                                                                                                                                                                                                                                                                                                                                                                                                                                                                                                                                                                                                                                                                                                                                            |
| Manuscript ID                   | bmjopen-2018-021617.R1                                                                                                                                                                                                                                                                                                                                                                                                                                                                                                                                                                                                                                                                                                                                                                                                                                                                                                                                                                                                                                                                                                                     |
| Article Type:                   | Research                                                                                                                                                                                                                                                                                                                                                                                                                                                                                                                                                                                                                                                                                                                                                                                                                                                                                                                                                                                                                                                                                                                                   |
| Date Submitted by the Author:   | 24-Feb-2018                                                                                                                                                                                                                                                                                                                                                                                                                                                                                                                                                                                                                                                                                                                                                                                                                                                                                                                                                                                                                                                                                                                                |
| Complete List of Authors:       | Reyes-Muñoz, Enrique; Instituto Nacional de Perinatología Isidro Espinosa de los Reyes , Endocrinology<br>Sandoval-Osuna, Norma; Instituto Nacional de Perinatología, Division of Obstetrics and Gynecology<br>Reyes-Mayoral, Christian ; Instituto Nacional de Perinatología Isidro Espinosa de los Reyes , Division of Obstetrics and Gynecology<br>Ortega-González , Carlos; Instituto Nacional de Perinatología Isidro Espinosa de los Reyes , Endocrinology<br>Martínez-Cruz, Nayeli; Instituto Nacional de Perinatología Isidro Espinosa de los Reyes , Endocrinology<br>Ramírez-Torres, María; Instituto Nacional de Perinatología Isidro Espinosa de los Reyes , Endocrinology<br>Arce-Sánchez, Lidia; Instituto Nacional de Perinatología Isidro Espinosa de los Reyes , Endocrinology<br>Lira-Plascencia, Josefina; Instituto Nacional de Perinatología Isidro Espinosa de los Reyes , Research Unit in Adolescent Medicine<br>Estrada-Gutiérrez, Guadalupe; Instituto Nacional de Perinatología Isidro Espinosa de los Reyes , Division of Biomedical Research<br>Montoya-Estrada, Araceli; Instituto Nacional de Perinatología |
| <b>Primary Subject Heading</b>: | Diabetes and endocrinology                                                                                                                                                                                                                                                                                                                                                                                                                                                                                                                                                                                                                                                                                                                                                                                                                                                                                                                                                                                                                                                                                                                 |
| Secondary Subject Heading:      | Obstetrics and gynaecology                                                                                                                                                                                                                                                                                                                                                                                                                                                                                                                                                                                                                                                                                                                                                                                                                                                                                                                                                                                                                                                                                                                 |
| Keywords:                       | gestational diabetes, IADPSG, hyperglycemia, pregnancy, adolescent                                                                                                                                                                                                                                                                                                                                                                                                                                                                                                                                                                                                                                                                                                                                                                                                                                                                                                                                                                                                                                                                         |
|                                 |                                                                                                                                                                                                                                                                                                                                                                                                                                                                                                                                                                                                                                                                                                                                                                                                                                                                                                                                                                                                                                                                                                                                            |

SCHOLARONE™  
Manuscripts

1  
2  
3 **Sensitivity of fasting glucose for gestational diabetes mellitus screening in Mexican**  
4 **adolescents based on International Association of Diabetes and Pregnancy Study Groups**  
5 **criteria: a diagnostic accuracy study based on retrospective data analysis**  
6  
7  
8  
9

10  
11  
12 Enrique Reyes-Muñoz<sup>1</sup>, Norma L. Sandoval-Osuna<sup>2</sup>, Christian Reyes-Mayoral<sup>2</sup>, Carlos Ortega-  
13 González<sup>3</sup>, Nayeli Martínez-Cruz<sup>3</sup>, María A. Ramírez-Torres<sup>3</sup>, Lidia Arce-Sánchez<sup>3</sup>, Josefina  
14 Lira-Plascencia<sup>4</sup>, Guadalupe Estrada-Gutiérrez<sup>5</sup>, Araceli Montoya-Estrada<sup>1</sup>  
15  
16  
17  
18

19  
20  
21  
22 <sup>1</sup>Department of Gynecological and Perinatal Endocrinology, <sup>2</sup>Division of Obstetrics and  
23 Gynecology, <sup>3</sup>Department of Endocrinology, <sup>4</sup>Research Unit in Adolescent Medicine, <sup>5</sup>Direction  
24 of Research, Instituto Nacional de Perinatología Isidro Espinosa de los Reyes, Mexico City,  
25  
26 Mexico.  
27  
28

29  
30  
31 Correspondence:

32  
33 Enrique Reyes Muñoz

34  
35 Department of Gynecological and Perinatal Endocrinology, Instituto Nacional de Perinatología  
36  
37 Isidro Espinosa de los Reyes, Mexico City.

38  
39 Montes Urales 800, Lomas Virreyes, Miguel Hidalgo. México, DF, CP 11000

40  
41 Phone: +52 (55) 55209900 ext. 299

42  
43 Email: dr.enriquereyes@gmail.com  
44  
45

46 **Keywords:** gestational diabetes, IADPSG, hyperglycaemia, pregnancy, adolescent.  
47  
48

49  
50 **Word count:** 3418  
51  
52  
53  
54  
55  
56  
57  
58  
59  
60

## ABSTRACT

**Objective:** To evaluate fasting plasma glucose (FPG) as a screening test for gestational diabetes mellitus (GDM) among Mexican adolescents using International Association of Diabetes and Pregnancy Study Groups criteria.

**Design:** Retrospective cohort study.

**Setting:** Level-three medical institution in Mexico City.

**Participants:** The study population comprised of 1,061 adolescent women aged 12–19 years with singleton pregnancies, who underwent a 75-g oral glucose tolerance test (OGTT) between 11 and 35 weeks of gestation.

**Primary and secondary outcome measures:** The sensitivity (Sn), specificity (Sp), positive and negative predictive values (PPV and NPV, respectively), and positive and negative likelihood ratios LR (+) and LR (-), respectively) with 95% confidence intervals (CI) for selected FPG cut-off values were compared. Secondary measures were perinatal outcomes in women with and without GDM.

**Results:** GDM was present in 71 women (6.7%, 95% CI: 5.3%–8.4%). The performance of FPG at thresholds of  $\geq 80$  (4.5 mmol/L), 85 (4.7 mmol/L), and 90 mg/dL (5.0 mmol/L) was as follows, (95% CI) respectively: Sn: 97% (89%–99%), 94% (86%–97%) and 91% (82%–95%); Sp: 50% (47%–53%), 79% (76%–81%) and 97% (95%–97%); PPV: 12% (9%–15%), 23% (18%–28%) and 64% (54%–73%); NPV: 99% (98.5%–99.9%) for all three cut-offs; LR (+): 1.9 (1.8–2.1), 4.3 (3.8–5.0), and 26.7 (18.8–37.1); and LR (-): 0.06 (0.02–0.23), 0.07 (0.03–0.19), and 0.09 (0.04–0.19), respectively. No significant differences in perinatal outcomes were found between adolescents with and without GDM.

1  
2  
3 **Conclusions:** A FPG cut-off of  $\geq 90$  mg/dL (5.0 mmol/L) is ideal for GDM screening in Mexican  
4 adolescent women. A FPG threshold of 90 mg/dl would miss 6 (8.5%) women with GDM, pick up  
5 34 (3.4%) women without GDM, and avoid 962 (90.7%) OGTTs.  
6  
7  
8  
9  
10  
11  
12

### 13 **Strengths and limitations of this research**

- 16 • A fasting glucose cut-off of  $\geq 90$  mg/dL (5.0 mmol/L) is ideal for GDM screening among  
17 Mexican adolescent women.
  - 21 • This is the first study in Mexico and Latin America addressing the prevalence of GDM in  
22 adolescent women using International Association of Diabetes and Pregnancy Study Groups  
23 criteria.
  - 28 • The study was retrospective; the findings are only applicable to Mexican, and potentially,  
29 Latin women.
  - 33 • The diagnostic validity of the test was not confirmed in a second independent population.
  - 36 • The sample size available to compare perinatal outcomes was limited.
- 37  
38  
39  
40  
41  
42  
43  
44  
45  
46  
47  
48  
49  
50  
51  
52  
53  
54  
55  
56  
57  
58  
59  
60



## INTRODUCTION

1  
2  
3  
4  
5  
6 Around 16 million women aged 15–19 years give birth each year, accounting for approximately  
7  
8 11% of all births worldwide. In total, 95% of these births occur in low- and middle-income  
9  
10 countries; 18% in Latin America and the Caribbean and more than 50% in sub-Saharan  
11  
12 Africa.[1] Latin women (including Mexican women) are considered a high-risk population for  
13  
14 diabetes and gestational diabetes mellitus (GDM).[2]  
15

16  
17 GDM refers to diabetes diagnosed in the second or third trimester of pregnancy that is not  
18  
19 clearly overt diabetes.[2] Although the prevalence of GDM is generally lower in adolescent  
20  
21 populations, a recently published guideline concerning adolescent pregnancy recommended  
22  
23 GDM testing for all pregnant adolescent women, similar to recommendations for adult women.[3]  
24

25  
26 Previous studies reported GDM prevalence rates of 1.7% among North American adolescent  
27  
28 women[4] and 0.97% among Mexican adolescent women;[5] both studies diagnosed GDM using  
29  
30 Carpenter and Coustan criteria.[6] However, reports about the prevalence of GDM in  
31  
32 adolescents diagnosed using the new International Association of Diabetes and Pregnancy  
33  
34 Study Groups (IADPSG) criteria are limited. The present authors previously reported a  
35  
36 prevalence of GDM among adult Mexican women of 30.3% using IADPSG criteria; a figure  
37  
38 three-fold higher than that obtained using the previous American Diabetes Association (ADA)  
39  
40 criteria (valid until 2010).[7]  
41  
42  
43

44  
45 In Mexico, pregnant adolescent women have a lower prevalence of overweight and obesity than  
46  
47 the general pregnant population. Additionally, most pregnant Mexican adolescent women are  
48  
49 primigravid. In part, these characteristics contribute to the low prevalence of GDM in this  
50  
51 population.[8,9] However, most pregnant Mexican adolescent women have lower socio-  
52  
53 economic status than adult women.[8] Lower socioeconomic status has been associated with a  
54  
55  
56  
57  
58  
59  
60

1  
2  
3 higher frequency of consumption of unhealthy foods (e.g. soft drinks[10]), which are associated  
4  
5 with increased risk of GDM among Mexican women.  
6  
7

8 Currently, GDM screening and diagnosis in adolescent women is controversial because of the  
9  
10 low prevalence of GDM in this population and non-universal strategies for diagnosing GDM. The  
11  
12 Hyperglycemia and Adverse Pregnancy Outcome (HAPO) study revealed significant  
13  
14 associations between adverse perinatal outcomes and fasting, 1- and 2-h glucose values during  
15  
16 a 2-h 75-g oral glucose tolerance test (OGTT).[11] Following these results, the IADPSG  
17  
18 recommended new criteria for the diagnosis and classification of hyperglycaemia during  
19  
20 pregnancy.[12] The new glucose thresholds corresponded to 1.75 times the estimated odds for  
21  
22 neonatal birth weight >90th percentile, cord C-peptide >90th percentile, and body fat percentage  
23  
24 >90th percentile.[12] Use of IADPSG criteria is supported by various international associations,  
25  
26 including the ADA,[2] Endocrine Society,[13] World Health Organization (WHO)[14] and  
27  
28 International Federation of Gynaecology and Obstetrics (FIGO).[15] However, other  
29  
30 organisations, including the American Congress of Obstetricians and Gynecologists (ACOG) and  
31  
32 the National Institute of Child Health and Human Development (NICHD), recommend that  
33  
34 healthcare providers continue to use a two-step approach to screen and diagnose GDM.[16,17]  
35  
36 They argue that there is no evidence to support clinically significant improvements in maternal or  
37  
38 new-born outcomes after using IADPSG criteria to diagnose GDM, and that following these  
39  
40 criteria leads to a significant increase in healthcare costs.[16,17] All of the abovementioned  
41  
42 organisations recommend universal screening for GDM using a one- or two-step strategy, and  
43  
44 none have specific recommendations regarding GDM screening for adolescent women.  
45  
46  
47  
48

49 In contrast, recent guidelines from the National Institute for Health and Care Excellence on  
50  
51 diabetes in pregnancy recommend 2-h 75-g OGTT at 24–28 gestational weeks to test for GDM  
52  
53 in women with risk factors. These guidelines also propose a diagnosis of GDM if a 2h 75-g  
54  
55 OGTT shows women have either a fasting glucose level  $\geq 100$  mg/dL (5.6 mmol/L) or a 2-h  
56  
57

1  
2  
3 glucose level  $\geq 140$  mg/dL (7.8 mmol/L).[18] In accordance with this guideline, adolescent  
4  
5 women should be tested for GDM if they have body mass index (BMI)  $\geq 30$  kg/m<sup>2</sup>, a previous  
6  
7 baby with macrosomia weighing  $\geq 4.5$  kg or with gestational diabetes, a first-degree relative with  
8  
9 diabetes, or an ethnic family origin with a high prevalence of diabetes.  
10

11  
12 Agarwal, et al.[19] suggested fasting plasma glucose can be used to decide if an OGTT is  
13  
14 needed or not. This would ease the burden on laboratories and save resources, as the IADPSG  
15  
16 recommendation that every pregnant woman undergoes a 2h 75-g OGTT is too demanding.[19]  
17  
18 A systematic review and meta-analysis of GDM screening tests concluded that glucose  
19  
20 challenge tests and fasting plasma glucose levels at 24 gestational weeks are useful for  
21  
22 identifying women who do not have GDM.[20] However, no studies have analysed the utility of  
23  
24 fasting glucose for screening GDM in adolescent women.  
25  
26

27  
28 This study aimed to evaluate the usefulness of fasting glucose for GDM screening among  
29  
30 Mexican adolescent women using IADPSG diagnostic criteria. Secondary goals were to report  
31  
32 the prevalence of GDM and perinatal outcomes in adolescent women with and without GDM.  
33  
34  
35  
36

## 37 **METHODS**

### 38 **Study design and participants**

39  
40  
41  
42  
43 A retrospective cohort study was conducted. The study population was adolescents who  
44  
45 received prenatal care at Instituto Nacional de Perinatología (INPer), in Mexico City, from June  
46  
47 1, 2011 to June 30, 2014. INPer is a reference centre that attends to high risk pregnancies,  
48  
49 including adolescent women. Nearly 4000 births are attended at INPer every year. This study  
50  
51 was approved by the INPer Internal Review Board (Register number 212250-42081). Written  
52  
53 informed consent from participants is not required by the Internal Review Board for retrospective  
54  
55 studies. The inclusion criteria were women who: were aged 12–19 years, had a singleton  
56  
57  
58  
59  
60

1 pregnancy, had received a 2-h 75-g OGTT administered at 11–35 weeks of gestation and had  
2 delivered at INPer. The exclusion criterion was women with any pathology, including any type of  
3 pre-gestational diabetes, lupus, heart disease, substance abuse, hypothyroidism, epilepsy,  
4 leukaemia, bulimia, anorexia, depressive disorder, autoimmune cirrhosis, asthma or multiple  
5 sclerosis. Adolescent women with pre-gestational diabetes (type 1 or 2) or GDM were referred to  
6 INPer from level-one or level-two attention centres, and OGTT was avoided in this population.  
7  
8  
9  
10  
11  
12  
13  
14  
15

## 16 **Procedure**

17  
18 First, adolescent women who delivered during the study period were identified from the  
19 electronic register of births. Next, non-electronic clinical records were reviewed to check if these  
20 women had received an OGTT, and in which week of gestation the test was performed.  
21 Pregnant adolescent women with an OGTT between 11 and 35 weeks of gestation were  
22 selected; if the inclusion criteria were fulfilled, their maternal and neonatal clinical records were  
23 requested to obtain data for analysis. Glucose was measured using the Vitros DT60 II chemistry  
24 system (OrthoClinical Diagnostics, Tilburg, the Netherlands), which has a sensitivity of 20 mg/dL  
25 (1.11 mmol/L) and a coefficient of variation of 1.4%–1.8%, according to the manufacturer's  
26 instructions. The laboratory fulfils the official Mexican norm (NOM-007-SSA3-2011) for the  
27 organisation and functioning of clinical laboratories in Mexico, and is certified by the Global  
28 Certification Bureau for quality management systems in concordance with the International  
29 Standards Organization 9001:2015 norm.  
30  
31  
32  
33  
34  
35  
36  
37  
38  
39  
40  
41  
42  
43  
44

45 Gestational age was calculated from the last menstrual period. If women were unaware of when  
46 their last menstrual period was or if the date was not reliable, the first trimester ultrasound  
47 measurement was used. At INPer, GDM is diagnosed based on the observation of two or more  
48 abnormal values during a 2-h 75-g OGTT: fasting  $\geq 95$  mg/dL (5.3 mmol/L), 1-h  $\geq 180$  mg/dL (10  
49 mmol/L) and 2-h  $\geq 155$  mg/dL (8.6 mmol/L), according to recommendations from the Fifth  
50 International Workshop-Conference on Gestational Diabetes Mellitus.[21] A single abnormal  
51  
52  
53  
54  
55  
56  
57  
58  
59  
60

1  
2  
3 value was not considered sufficient for GDM diagnosis, and women who showed one value did  
4 not receive GDM-specific treatment. Women with two or more abnormal glucose values during  
5 OGTT received medical nutrition therapy (MNT) and subsequent evaluation of glycaemic control  
6 at 2–4 week intervals. For women who did not achieve glycaemic control with MNT, metformin  
7 was added at doses of 1500–2550 mg and/or insulin therapy (0.3–1.0 U/kg of body weight) to  
8 achieve goals for capillary glucose (self-monitoring): fasting <95 mg/dL (5.3 mmol/L) and 1-h  
9 postprandial <140 mg/dL (7.8 mmol/L).

### 17 **Study variables**

20  
21 Fasting glucose was determined as part of the 2-h 75-g OGTT. Cut-off values were established  
22 using a receiver operating characteristic (ROC) curve and Youden's index. Glucose values  
23 obtained during the OGTTs were re-analysed according to IADPSG criteria, and GDM diagnosis  
24 was defined as one or more abnormal glucose value: fasting  $\geq 92$  mg/dL (5.1 mmol/L), 1-h  $\geq 180$   
25 mg/dL (10 mmol/L) and 2-h  $\geq 153$  mg/dL (8.5 mmol/L).[12]

26  
27 Additionally, perinatal outcomes were compared between women with and without GDM. This  
28 analysis only included GDM women without treatment. Large for gestational age was defined as  
29 a birth weight above the 90th percentile for sex and gestational age for Mexican people,[22] and  
30 small for gestational age as a birth weight below the 10th percentile for sex and gestational age  
31 for Mexican people.[22] Preeclampsia was defined as a blood pressure of  $\geq 140/90$  mmHg, and  
32 proteinuria as blood pressure  $>300$  mg/24 h. In the absence of proteinuria, the diagnosis of  
33 preeclampsia was based on a blood pressure of  $\geq 140/90$  mmHg and one or more severity  
34 criteria: thrombocytopenia, abnormal liver function, recent development of renal failure,  
35 pulmonary oedema or brain or visual disturbances. Gestational hypertension was defined as  
36 blood pressure  $\geq 140/90$  mmHg after 20 gestational weeks in the absence of proteinuria and  
37 severity criteria. Intrauterine growth restriction was defined as the presence of an estimated  
38 foetal weight below the third percentile. Polyhydramnios was defined by an amniotic fluid index

1  
2  
3 of >18 cm. Preterm birth was defined as birth after 20 and before 37 weeks of gestation.  
4  
5 Maternal overweight was defined as a BMI for age greater than a +1 Z-score, and obesity as a  
6  
7 BMI for age greater than a +2 Z-score, based on WHO references.  
8  
9

### 10 **Sample size**

11  
12  
13 The sample size was calculated using recommendations for sample size estimation in diagnostic  
14  
15 test studies. To find a 90% fasting glucose sensitivity for GDM screening, considering a  
16  
17 prevalence of GDM of 6% and a maximum marginal error of 15% with a 95% confidence level  
18  
19 (CI), a sample size of 345 participants was required. However, all adolescent pregnant women  
20  
21 who met the inclusion criteria during the study period were included in the analysis.  
22  
23

### 24 **Statistical analysis**

25  
26  
27 SPSS version 15 (Chicago, IL, USA) was used for the statistical analyses. Continuous variables  
28  
29 were expressed as mean  $\pm$  standard deviation, and categorical variables as frequencies and  
30  
31 proportions. Student's t- or Mann-Whitney U-tests were used to compare continuous variables  
32  
33 according to the variable distribution. Chi-square or Fisher's exact tests were used to evaluate  
34  
35 differences in proportions. Statistical significance was considered as  $p \leq 0.05$ . Contingency tables  
36  
37 were determined to calculate sensitivity, specificity, positive predictive value (PPV), negative  
38  
39 predictive value (NPV), positive likelihood ratio (LR+), and negative likelihood ratio (LR-) with  
40  
41 95% CIs, using different cut-off values based on the ROC curve and Youden's index. The  
42  
43 difference in the risk for adverse perinatal outcomes between adolescents with and without GDM  
44  
45 was determined by calculating the odds ratio with a 95% CI.  
46  
47  
48

49 **Patient and Public Involvement:** Patients and public were not involved in this study.  
50  
51  
52  
53  
54  
55  
56  
57  
58  
59  
60

## RESULTS

During the study period, there were 11,618 births at the study institution, 2,122 of which occurred in adolescent women. In total, 1,315 pregnant adolescent women had received a 2-h 75-g OGTT. Of these women, 1,061 met the inclusion criteria; 254 were excluded because of incomplete clinical records (n=105), twin pregnancies (n=13), incomplete OGTT (n=11), pregestational diabetes (n=2), or some additional pathology (n=123).

Most adolescent women who did not receive an OGTT received attention for hospitalisation or delivery for various reasons including: preterm labour, premature rupture of membranes, preeclampsia, and labour in active phase. During the study period, 32 pregnant adolescent women were referred to INPer with a previous diagnosis of some type of diabetes and had not received an OGTT; 19 with pre-gestational diabetes (eight with type 1 diabetes and nine with type 2 diabetes), and 13 with GDM.

Seventy-one women were diagnosed with GDM, corresponding to a prevalence rate of 6.7% (95% CI 5.3%–8.4%). Baseline data for adolescents with and without GDM collected on study enrolment are shown in Table 1. Adolescents with GDM had higher weight and BMI than adolescents without GDM. The prevalence of obesity was higher among GDM women compared with those without GDM (p=0.001). Among the 71 adolescents with GDM diagnosed according to IADPSG criteria, the frequencies of abnormal glucose values during the 2-h 75-g OGTT were: fasting 64 (90.1%), 1-h 5 (7.0%) and 2-h 7 (9.9%). Only one adolescent had three abnormal glucose values, and three adolescents had two abnormal glucose values.

**Table 1. Characteristics of adolescent women at study admission (N=1,061)**

| Characteristics | Total adoles<br>n=990 | Adolescents<br>without GDM<br>n=71 | Adolescents<br>with GDM<br>n=71 | <i>p</i> * |
|-----------------|-----------------------|------------------------------------|---------------------------------|------------|
|-----------------|-----------------------|------------------------------------|---------------------------------|------------|

|                                               | <b>cents</b>  |              |              |        |
|-----------------------------------------------|---------------|--------------|--------------|--------|
|                                               | <b>N=1061</b> |              |              |        |
| Age (years)                                   | 16.1 ± 1.6    | 16.1 ± 1.5   | 16.2 ± 1.6   | 0.51   |
| Weight (kg)                                   | 59.1 ± 10.0   | 58.7 ± 9.8   | 63.9 ± 11.5  | 0.0001 |
| Height (m)                                    | 1.56 ± 0.05   | 1.56 ± 0.05  | 1.56 ± 0.05  | 0.69   |
| Body mass index<br>(kg/m <sup>2</sup> )       | 24.3 ± 3.6    | 24.1 ± 3.5   | 26.2 ± 4.1   | 0.0001 |
| Gestational age at 2-h<br>75-g OGTT (weeks)   | 25.0 ± 4.4    | 24.1 ± 3.5   | 26.1 ± 4.1   | 0.008  |
| Glucose (mg/dL)                               |               |              |              |        |
| Fasting                                       | 80.2 ± 7.3    | 79.2 ± 6.2   | 94.4 ± 6.2   | 0.0001 |
| 1-h                                           | 105.2 ± 25.7  | 103.6 ± 24.6 | 127.9 ± 29.5 | 0.0001 |
| 2-h                                           | 97.9 ± 19.4   | 96.6 ± 18.4  | 114 ± 24.4   | 0.0001 |
| Number of pregnancies                         |               |              |              |        |
| 1                                             | 923 (86.9)    | 865 (87.3)   | 58 (81.7)    | 0.08   |
| 2                                             | 121 (11.4)    | 110 (11.1)   | 11 (15.5)    | 0.17   |
| 3 or more                                     | 18 (1.7)      | 16 (1.6)     | 2 (2.8)      | 0.61   |
| Normal weight                                 | 582 (55.6)    | 559 (57.3)   | 23 (32.4)    | 0.001  |
| Overweight                                    | 357 (34.1)    | 324 (33.2)   | 33 (46.5)    | 0.01   |
| Obesity                                       | 92 (8.8)      | 77 (7.9)     | 15 (21.1)    | 0.001  |
| First-degree relative<br>with type 2 diabetes | 157 (14.8)    | 140 (14.1)   | 17(23.9)     | 0.0.2  |

Values expressed as mean ± standard deviation or frequency (percentage). \*Student's t- or chi square test. OGTT, oral glucose tolerance test.



1  
2  
3 Figure 1 shows the ROC curve. The area under the curve was 0.96 (95% CI 0.93–0.99)  
4  
5 ( $p=0.0001$ ). Table 2 shows the results of the characterisation of the five fasting glucose cut-off  
6  
7 values for GDM screening: 75, 80, 85, 90 and 92 mg/dL (4.2, 4.5, 4.7, 5.0 and 5.1 mmol/L,  
8  
9 respectively). These cut-off values for fasting glucose were chosen based on Youden's index,  
10  
11 and rounded up to the nearest integer (mg/dL). The best cut-off for fasting glucose according to  
12  
13 Youden's index was 90 mg/dL. Using a cut-off of 85 mg/dL (4.72 mmol/L), a total of 279 (26.3%)  
14  
15 OGTTs would be necessary, whereas only 99 (9.3%) would be required with a cut-off of 90  
16  
17 mg/dL (5.0 mmol/L).  
18  
19  
20  
21  
22  
23

24 **Figure 1. Receiver operating characteristic curve shows an area under the curve of 0.96**  
25  
26  
27  
28  
29  
30  
31  
32  
33  
34  
35  
36  
37  
38  
39  
40  
41  
42  
43  
44  
45  
46  
47  
48  
49  
50  
51  
52  
53  
54  
55  
56  
57  
58  
59  
60

**Table 2. Gestational diabetes mellitus screening capacity among Mexican adolescents at different fasting glucose cut-off values**

| <b>Fasting glucose cut-off</b> | <b>Sensitivity (95% CI)</b> | <b>Specificity (95% CI)</b> | <b>PPV (95% CI)</b> | <b>NPV (95% CI)</b> | <b>LR+ (95% CI)</b> | <b>LR- (95% CI)</b> | <b>OGTT</b>    |
|--------------------------------|-----------------------------|-----------------------------|---------------------|---------------------|---------------------|---------------------|----------------|
| 75 mg/dL<br>(4.2 mmol/L)       | 98.5<br>(92–99)             | 22.4<br>(20–25)             | 7.9<br>(6–10)       | 99.6<br>(97–99.9)   | 1.3<br>(1.2–1.3)    | 0.06<br>(0.01–0.46) | 838<br>(79%)   |
| 80 mg/dL<br>(4.5 mmol/L)       | 97<br>(89–99)               | 50.1<br>(47–53)             | 11.6<br>(9–15)      | 99.6<br>(98.5–99.9) | 1.9<br>(1.8–2.1)    | 0.06<br>(0.02–0.23) | 563<br>(53.1%) |
| 85 mg/dL<br>(4.7 mmol/L)       | 94<br>(86–97)               | 78.6<br>(76–81)             | 22.9<br>(18–28)     | 99.5<br>(98–99.8)   | 4.3<br>(3.8–5.0)    | 0.07<br>(0.03–0.19) | 279<br>(26.3%) |
| 90 mg/dL<br>(5.0 mmol/L)       | 91<br>(82–95)               | 96.6<br>(95–97)             | 64.2<br>(54–73)     | 99.4<br>(98.6–99.7) | 26.7<br>(18.8–37)   | 0.09<br>(0.04–0.19) | 99<br>(9.3%)   |
| 92 mg/dL<br>(5.1 mmol/L)       | 88.4<br>(78–94)             | 99.9<br>(99–100)            | 99.2<br>(91–99)     | 99.2<br>(98–99)     | 884<br>(123–6231)   | 0.12<br>(0.06–0.22) | 64<br>(6%)     |

CI = confidence interval, PPV = predictive positive value, NPV = negative predictive value, LR = likelihood ratio, OGTT = oral glucose tolerance test.

There were no differences in perinatal outcomes among Mexican adolescent women with GDM without treatment and those without GDM (Table 3). However, there was a higher incidence of neonates that were small for gestational age among adolescents without GDM. Four women with GDM that received specific GDM treatment were excluded from this analysis; three with MNT and one with MNT plus metformin.

**Table 3. Risk of adverse perinatal outcomes among Mexican adolescent women with gestational diabetes mellitus<sup>a</sup> without treatment**

| Adverse perinatal outcomes      | Total<br>N=1057 | Without GDM<br>n=990<br>n (%) | With GDM<br>n=67<br>n (%) | Odds ratio<br>(95% CI) | p    |
|---------------------------------|-----------------|-------------------------------|---------------------------|------------------------|------|
| Intrauterine growth restriction | 36 (3.4)        | 35 (3.5)                      | 1 (1.5)                   | 0.41<br>(0.06–3.1)     | 0.37 |
| Polyhydramnios                  | 13 (1.2)        | 12 (1.2)                      | 1 (1.5)                   | 1.2<br>(0.41–3.4)      | 0.84 |
| Gestational hypertension        | 54 (5.1)        | 50 (5.1)                      | 4 (6.0)                   | 1.2<br>(0.28–5.5)      | 0.74 |
| Preeclampsia                    | 52 (4.9)        | 49 (4.9)                      | 3 (4.5)                   | 0.9<br>(0.27–2.9)      | 0.86 |
| Preterm birth                   | 140 (13.3)      | 130 (13.1)                    | 10 (14.9)                 | 1.15<br>(0.57–2.3)     | 0.67 |
| Premature rupture of membranes  | 15 (1.4)        | 13 (1.3)                      | 2 (3.0)                   | 2.3<br>(0.51–20.5)     | 0.26 |
| Caesarean section               | 542 (51.3)      | 505 (51)                      | 37 (55.2)                 | 1.18<br>(0.72–1.95)    | 0.50 |

|                   |            |            |         |            |      |
|-------------------|------------|------------|---------|------------|------|
| Obstetric         | 28 (2.6)   | 26 (2.6)   | 2 (3.0) | 1.14       | 0.86 |
| haemorrhage       |            |            |         | (0.26–4.9) |      |
| Neonate large for | 33 (3.1)   | 32 (3.3)   | 1 (1.5) | 0.45       | 0.42 |
| gestational age   |            |            |         | (0.06–3.3) |      |
| Neonate small for | 122 (11.6) | 117 (11.2) | 5 (7.5) | 0.59       | 0.27 |
| gestational age   |            |            |         | (0.23–1.5) |      |
| Congenital        | 28 (2.6)   | 28 (2.6)   | 2 (3.0) | 1.14       | 0.86 |
| malformations     |            |            |         | (0.26–4.9) |      |

<sup>a</sup> diagnosed using International Association of Diabetes and Pregnancy Study Groups criteria

CI = confidence interval, GDM = gestational diabetes mellitus.

## DISCUSSION

The present study showed that a fasting glucose cut-off value of  $\geq 90$  mg/dL (5.0 mmol/L) exhibited good sensitivity and specificity for GDM screening in Mexican adolescents. Using this cut-off value improved the ability to identify healthy patients and reduced the need to perform an OGTT to confirm/exclude the diagnosis of GDM, resulting in similar detection rates. This study is the first to report the prevalence of GDM in an adolescent population using IADPSG criteria, and describe perinatal outcomes in GDM adolescent women without treatment.

Fasting glucose was altered in 90.1% of GDM cases (n=64), but altered glucose values in the 2-h 75-g OGTT were only found in 7% of women at 1-h and 9.9% at 2-h. This suggests that fasting glucose can be used as a screening tool for GDM in this population. Although the potential of fasting glucose as a screening strategy has been reported in previous studies in adult women,<sup>[20,23]</sup> no studies have used IADPSG criteria to diagnose GDM in adolescent women. The first unbiased study to suggest this diagnostic strategy was published in 1998 by Reichelt et al.,<sup>[24]</sup> who reported sensitivity of 94% and specificity of 66% using a fasting glucose cut-off

1  
2  
3 value of  $\geq 85$  mg/dL (4.72 mmol/dL) in adult Brazilian women. A meta-analysis conducted by  
4  
5 Donovan et al.[20] reported seven studies that used fasting glucose for GDM screening;  
6  
7 however, all of those studies diagnosed GDM with Carpenter and Coustan criteria, and fasting  
8  
9 glucose cut-offs values of  $\geq 85$  mg/dL (4.72 mmol/L) and  $\geq 95$  mg/dL (5.27 mmol/L) resulted in  
10  
11 sensitivity and specificity values of 87% and 52%, and 54% and 93%, respectively.  
12  
13

14  
15 In 2010, Agarwal et al.[19] published a study involving 10,283 pregnant women (maternal age:  
16  
17  $28.3 \pm 6.1$  years) from the United Arab Emirates. Using IADPSG criteria, those authors reported  
18  
19 that fasting glucose cut-offs of 75 mg/dL (4.16 mmol/L), 85 mg/dL (4.72 mmol/L) and 92 mg/dL  
20  
21 (5.11 mmol/L) resulted in sensitivity and specificity values of 98.3% and 11.3%, 88.9 and 60%,  
22  
23 and 76.8% and 100%, respectively.[19] Although these populations are not comparable, the  
24  
25 sensitivity and specificity found in this study using glucose cut-off values of 85 and 90 mg/dL  
26  
27 (4.72 and 5.0 mmol/L) in Mexican adolescents were higher. In the present study, the abnormal  
28  
29 fasting glucose rate was higher than that used in the HAPO study for GDM diagnosis, in which  
30  
31 the higher rates were 74% for women from Barbados and 73% for women from Bellflower, CA.  
32  
33 [25] This discrepancy may be explained by maternal age and ethnic group. The mean maternal  
34  
35 age in the present study was  $16.2 \pm 1.6$  years, while that in the HAPO study was  $29.2 \pm 5.8$   
36  
37 years. Gopalakrishnan et al.[26] reported that 91.4% of adult North Indian women with GDM  
38  
39 according to IADPSG criteria had abnormal fasting plasma glucose, which was similar to  
40  
41 findings in the present study. Similarly, Trujillo et al.[27] reported an area under the curve of 0.96  
42  
43 in adult Brazilian women for fasting glucose values to detect GDM as defined by IADPSG  
44  
45 diagnostic criteria. In the same study, a fasting plasma glucose cut-off value of 85 mg/dL  
46  
47 indicated that only 18.7% of all women needed to undergo an OGTT, with a detection rate of  
48  
49 92.5% of all GDM cases, whereas a cut-off of 90 mg/dl had a detection rate of 88.3% GDM  
50  
51 cases (indicating an OGTT would be necessary in only 4.2% of all women).[27] These findings  
52  
53 were similar to those of the present study. If these results are confirmed, OGTT could be  
54  
55  
56  
57  
58  
59  
60

1  
2  
3 avoided in Mexican adolescent women because 90.1% of women with GDM can be diagnosed  
4  
5 using fasting glucose, in accordance with IADPSG criteria.  
6  
7

8 The prevalence of GDM in adolescent women at INPer increased significantly from 0.4% using  
9  
10 current criteria to 6.7% using IADPSG criteria; however, 38% of pregnant adolescents attended  
11  
12 during the study period did not have clinical records of GDM screening because they only  
13  
14 arrived for delivery. The perinatal outcomes in the present study were similar in adolescents with  
15  
16 and without GDM, even though 94.3% of adolescents with GDM did not receive GDM-specific  
17  
18 treatment. This finding was consistent with the cost-benefit analysis reported by Werner et  
19  
20 al.,[28] who concluded that the perinatal benefits associated with use of the IADPSG criteria did  
21  
22 not justify the additional costs associated with a three-fold increase in the number of women  
23  
24 diagnosed with GDM. However, using the IADPSG criteria may be beneficial for this young and  
25  
26 vulnerable group. If their conversion rate to type 2 diabetes is the same as shown in previous  
27  
28 systematic reviews and meta-analyses,[29,30] they would likely develop type 2 diabetes at a  
29  
30 young age; an opportune intervention could reduce the long-term incidence of type 2 diabetes. A  
31  
32 recent systematic review indicated that interventions addressing health behaviour in women with  
33  
34 previous GDM starting up to 1 year postpartum was superior to no intervention with regard to  
35  
36 type 2 diabetes prevention.[31] In addition, these women are likely to have subsequent  
37  
38 pregnancies and recurrent GDM.[32]  
39  
40  
41

42 This study had several limitations. The study was retrospective, the diagnostic validity of the test  
43  
44 has not yet been confirmed in a second independent population, and the results are only  
45  
46 applicable to Mexican (and potentially Latin) adolescent women. Future prospective and  
47  
48 multicentre studies are required to corroborate these findings. Another limitation was that the  
49  
50 available sample size to compare perinatal outcomes between women with and without GDM  
51  
52 was insufficient. Future studies with appropriate power are needed to confirm these results.  
53  
54  
55  
56  
57  
58  
59  
60

1  
2  
3 Most adolescent women at INPer request prenatal care in the middle of the second trimester.  
4  
5 This is similar to a study by Lira-Plascencia et al.[33] that reported the mean gestational age at  
6  
7 the first prenatal visit among 2,315 pregnant in the same institution was  $24.2 \pm 6.7$  weeks of  
8  
9 gestation. It is important to note that two adolescents with overt diabetes (type 2 diabetes) were  
10  
11 identified in early pregnancy and were excluded from the analysis; this is consistent with  
12  
13 reported trends in the prevalence of type 1 and type 2 diabetes among the Hispanic youth  
14  
15 population that increased from 0.96 to 1.29 and 0.45 to 0.79 per 1000 women, respectively,  
16  
17 between 2001 and 2009.[34]  
18

19  
20 According to the IADPSG,[12] ADA,[2] Endocrine Society,[12] WHO,[14] FIGO,[15] ACOG,[16]  
21  
22 NICHHD[18] and the Society of Obstetricians and Gynaecologists of Canada,[3] all pregnant  
23  
24 adolescents should be screened for GDM between 24 and 28 weeks of gestation. This  
25  
26 intervention has an impact on the cost of prenatal care in the health systems of low- and middle-  
27  
28 income countries including Mexico, regardless of the low prevalence of GDM in adolescents  
29  
30 compared with the adult population and the lack of evidence about the benefits of treatment on  
31  
32 perinatal outcomes using IADPSG criteria. However, the diagnosis of GDM in adolescents along  
33  
34 with an appropriate intervention programme may decrease the prevalence of type 2 diabetes in  
35  
36 this population in the long term.  
37  
38

39  
40 Future research should further investigate the use of fasting glucose as a screening tool to  
41  
42 identify candidates for OGTT, the benefits of treating GDM in adolescent women, the prevalence  
43  
44 of type 2 diabetes during the first trimester of pregnancy, and the risk for type 2 diabetes in  
45  
46 adolescent women with GDM in the long term.  
47  
48

## 49 **CONCLUSIONS**

50  
51  
52 A fasting plasma glucose cut-off value of  $\geq 90$  mg/dL (5.0 mmol/L) is ideal for GDM screening in  
53  
54 Mexican adolescent women. A fasting plasma glucose threshold of 90 mg/dl would miss 6  
55  
56  
57

1  
2  
3 (8.5%) women with GDM, pick up 34 (3.4%) women without GDM and avoid 962 (90.7%)  
4  
5 OGTTs.

6  
7  
8 **Funding statement:** This work was supported by National Council of Science and Technology,  
9  
10 CONACYT, Mexico (Grant: 233634) and Instituto Nacional de Perinatología Isidro Espinosa de  
11  
12 los Reyes, Mexico City (Registry ID: 212250-3402-10102-02-14).

13  
14  
15 **Ethics approval and consent to participate:** The study was approved by the Ethics and  
16  
17 Research Internal Review Board of the Instituto Nacional de Perinatología in Mexico City  
18  
19 (register number: 212250-3402-10102-02-14). Written informed consent from participants is not  
20  
21 required by the Internal Review Board for retrospective studies.

22  
23  
24  
25 **Competing interests:** All authors have completed the ICMJE uniform disclosure form at  
26  
27 [www.icmje.org/coi\\_disclosure.pdf](http://www.icmje.org/coi_disclosure.pdf) and declare: No support from any organisation for the  
28  
29 submitted work; no financial relationships with any organisations that might have an interest in  
30  
31 the submitted work in the previous 3 years; no other relationships or activities that could appear  
32  
33 to have influenced the submitted work.

34  
35  
36 **Authors' contributions:** ERM, NSO and JLP conceived and designed the study, analysed the  
37  
38 data, and wrote the paper. NMC, LAS, COG and GEG analysed the data and reviewed the  
39  
40 paper. NSO, CRM, ART and AME acquired the data, interpreted the results and reviewed the  
41  
42 paper.

43  
44  
45 **Data sharing statement:** All relevant data are within the paper. No additional data are available.

46  
47 **Acknowledgements:** We thank Audrey Holmes, MA, from Edanz Group  
48  
49 ([www.edanzediting.com/ac](http://www.edanzediting.com/ac)) for editing a draft of this manuscript.



## References

1. World Health Organization. Adolescent pregnancy. Available at [http://www.who.int/maternal\\_child\\_adolescent/topics/maternal/adolescent\\_pregnancy/en/](http://www.who.int/maternal_child_adolescent/topics/maternal/adolescent_pregnancy/en/) (accessed January 18, 2017).
2. American Diabetes Association. Classification and diagnosis of diabetes. *Diabetes Care* 2015;38:S8–S16.
3. Fleming N, O'Driscoll T, Becker G, et al. Adolescent pregnancy guidelines. *J Obstet Gynaecol Can* 2015;37:740–59.
4. Khine ML, Winklestein A, Copel JA. Selective screening for gestational diabetes mellitus in adolescent pregnancies. *Obstet Gynecol* 1999;93:738–42.
5. Ramírez-Torres MA, Rodríguez-Pezino J, Zambrana-Castañeda M, et al. Gestational diabetes mellitus and glucose intolerance among Mexican pregnant adolescents. *J Pediatr Endocrinol Metab* 2003;16:401–5.
6. Carpenter MW, Coustan DR. Criteria for screening tests for gestational diabetes. *Am J Obstet Gynecol* 1982;144:768–73.
7. Reyes-Muñoz E, Parra A, Castillo-Mora A, et al. Effect of the diagnostic criteria of the International Association of Diabetes and Pregnancy Study Groups on the prevalence of gestational diabetes mellitus in urban Mexican women: a cross-sectional study. *Endocr Pract* 2012;18:146–51.
8. Minjares-Granillo RO, Reza-López SA, Caballero-Valdez S, et al. Maternal and perinatal outcomes among adolescents and mature women: a hospital-based study in the north of Mexico. *J Pediatr Adolesc Gynecol* 2016;29:304–11.
9. Lira-Plascencia J, Oviedo-Cruz H, Pereira LA, et al. Analysis of the perinatal results of the first five years of the functioning of a clinic for pregnant teenagers. *Ginecol Obstet Mex* 2006;74:241–6.

10. Ortiz-Hernández L, Gómez-Tello BL. Food consumption in Mexican adolescents. *Rev Panam Salud Publica* 2008;24:127–35.
11. HAPO Study Cooperative Research Group, Metzger BE, Lowe LP, et al. Hyperglycemia and adverse pregnancy outcomes. *N Engl J Med* 2008;358:1991–2002.
12. International Association of Diabetes and Pregnancy Study Groups Consensus Panel, Metzger BE, Gabbe SG, et al. International Association of Diabetes and Pregnancy Study Groups recommendations on the diagnosis and classification of hyperglycemia in pregnancy. *Diabetes Care* 2010;33:676–82.
13. Blumer I, Hadar E, Hadden DR, et al. Diabetes and pregnancy: an endocrine society clinical practice guideline. *J Clin Endocrinol Metab* 2013;98:4227–49.
14. World Health Organization. Diagnostic criteria and classification of hyperglycaemia first detected in pregnancy. WHO/NMH/MND/13.2, Geneva: WHO Press; 2013.
15. Hod M, Kapur A, Sacks DA, et al. The International Federation of Gynaecology and Obstetrics (FIGO) initiative on gestational diabetes mellitus: A pragmatic guide for diagnosis, management, and care. *Int J Gynaecol Obstet* 2015;131:S173–211.
16. American Congress of Obstetricians and Gynecologists. Committee on Practice Bulletins-Obstetrics. Practice Bulletin No. 137: Gestational diabetes mellitus. *Obstet Gynecol* 2013;122:406–16.
17. Vandorsten JP, Dodson WC, Espeland MA, et al. NIH consensus development conference: diagnosing gestational diabetes mellitus. *NIH Consens State Sci Statements* 2013;29:1–31.
18. National Institute for Health and Care Excellence. Diabetes in pregnancy: management of diabetes and its complications from preconception to the postnatal period. Clinical guidelines. London: National Collaborating Centre for Women’s and Children’s Health (UK) 2015.
19. Agarwal MM, Dhatt GS, Shah SM. Simplifying the International Association of Diabetes and Pregnancy diagnostic algorithm using fasting plasma glucose. *Diabetes Care* 2010;33:2018–20.
20. Donovan L, Hartling L, Muise M, et al. Screening tests for gestational diabetes: a systematic

1  
2  
3 review for the U.S. Preventive Services Task Force. *Ann Intern Med* 2013;159:115–22.

4  
5 21. Metzger BE, Buchanan TA, Coustan DR, et al. Summary and recommendations of the Fifth  
6  
7 International Workshop-Conference on Gestational Diabetes Mellitus. *Diabetes Care*  
8  
9 2007;30:251–60.

10  
11 22. Flores-Huerta S, Martínez-Salgado H. Birth weight of male and female infants born in  
12  
13 hospitals affiliated with the Instituto Mexicano del Seguro Social. *Bol Med Hosp Infant Mex*  
14  
15 2012;69:30–9.

16  
17 23. Agarwal MM. Gestational diabetes mellitus: Screening with fasting plasma glucose. *World J*  
18  
19 *Diabetes* 2016;7:279–89.

20  
21 24. Reichelt A, Spichler E, Branchtein L, et al. Fasting plasma glucose is a useful test for the  
22  
23 detection of gestational diabetes. *Diabetes Care* 1998;21:1246–9.

24  
25 25. Sacks DA, Hadden DR, Maresh M, et al. Frequency of gestational diabetes mellitus at  
26  
27 collaborating centers based on IADPSG consensus panel-recommended criteria: the  
28  
29 Hyperglycemia and Adverse Pregnancy Outcome (HAPO) Study. *Diabetes Care* 2012;35:526–8.

30  
31 26. Gopalakrishnan V, Singh R, Pradeep Y, et al. Evaluation of the prevalence of gestational  
32  
33 diabetes mellitus in North Indians using the International Association of Diabetes and Pregnancy  
34  
35 Study groups (IADPSG) criteria. *J Postgrad Med* 2015;61:155–8.

36  
37 27. Trujillo J, Vigo A, Reichelt A, et al. Fasting plasma glucose to avoid a full OGTT in the  
38  
39 diagnosis of gestational diabetes. *Diabetes Res Clin Pract* 2014;105:322–6.

40  
41 28. Werner EF, Pettker CM, Zuckerwise L, et al. Screening for gestational diabetes mellitus: are  
42  
43 the criteria proposed by the International Association of the Diabetes and Pregnancy Study  
44  
45 Groups cost-effective? *Diabetes Care* 2012;35:529–35.

46  
47 29. Bellamy L, Casas JP, Hingorani AD, et al. Type 2 diabetes mellitus after gestational  
48  
49 diabetes: a systematic review and meta-analysis. *Lancet* 2009;373:1773–9.

50  
51 30. Rayanagoudar G, Hashi AA, Zamora J, et al. Quantification of the type 2 diabetes risk in  
52  
53 women with gestational diabetes: a systematic review and meta-analysis of 95,750 women.  
54  
55  
56  
57

1  
2  
3 *Diabetologia* 2016;59:1403–11.  
4

5 31. Pedersen ALW, Terkildsen Maindal H, Juul L. How to prevent type 2 diabetes in women with  
6 previous gestational diabetes? A systematic review of behavioural interventions. *Prim Care*  
7 *Diabetes* 2017;11:403-413.  
8  
9  
10

11 32. Schwartz N, Nachum Z, Green MS. The prevalence of gestational diabetes mellitus  
12 recurrence—effect of ethnicity and parity: a meta-analysis. *Am J Obstet Gynecol* 2015;213:310–  
13  
14  
15  
16 7.

17 33. Lira-Plascencia J, Oviedo-Cruz H, Pereira LA, et al. Analysis of the perinatal results of the  
18 first five years of the functioning of a clinic for pregnant teenagers. *Ginecol Obstet Mex*  
19  
20  
21  
22 2006;74:241–6.  
23

24 34. Dabelea D, Mayer-Davis EJ, Saydah S, et al. Prevalence of type 1 and type 2 diabetes  
25 among children and adolescents from 2001 to 2009. *JAMA* 2014;311:1778–86.  
26  
27  
28  
29  
30  
31  
32  
33  
34  
35  
36  
37  
38  
39  
40  
41  
42  
43  
44  
45  
46  
47  
48  
49  
50  
51  
52  
53  
54  
55  
56  
57  
58  
59  
60



Receiver operating characteristic curve shows an area under the curve of 0.96

139x123mm (300 x 300 DPI)

only

| Section & Topic          | No  | Item                                                                                                                                                   | Reported on page # |
|--------------------------|-----|--------------------------------------------------------------------------------------------------------------------------------------------------------|--------------------|
| <b>TITLE OR ABSTRACT</b> |     |                                                                                                                                                        |                    |
|                          | 1   | Identification as a study of diagnostic accuracy using at least one measure of accuracy (such as sensitivity, specificity, predictive values, or AUC)  | Title and page 2   |
| <b>ABSTRACT</b>          |     |                                                                                                                                                        |                    |
|                          | 2   | Structured summary of study design, methods, results, and conclusions (for specific guidance, see STARD for Abstracts)                                 | 2,3                |
| <b>INTRODUCTION</b>      |     |                                                                                                                                                        |                    |
|                          | 3   | Scientific and clinical background, including the intended use and clinical role of the index test                                                     | 4-6                |
|                          | 4   | Study objectives and hypotheses                                                                                                                        | 6                  |
| <b>METHODS</b>           |     |                                                                                                                                                        |                    |
| <i>Study design</i>      | 5   | Whether data collection was planned before the index test and reference standard were performed (prospective study) or after (retrospective study)     | 6,8                |
| <i>Participants</i>      | 6   | Eligibility criteria                                                                                                                                   | 6                  |
|                          | 7   | On what basis potentially eligible participants were identified (such as symptoms, results from previous tests, inclusion in registry)                 | 6,7                |
|                          | 8   | Where and when potentially eligible participants were identified (setting, location and dates)                                                         | 6,7                |
|                          | 9   | Whether participants formed a consecutive, random or convenience series                                                                                | 7                  |
| <i>Test methods</i>      | 10a | Index test, in sufficient detail to allow replication                                                                                                  | 7,8                |
|                          | 10b | Reference standard, in sufficient detail to allow replication                                                                                          | 7,8                |
|                          | 11  | Rationale for choosing the reference standard (if alternatives exist)                                                                                  | 7,8                |
|                          | 12a | Definition of and rationale for test positivity cut-offs or result categories of the index test, distinguishing pre-specified from exploratory         | 8                  |
|                          | 12b | Definition of and rationale for test positivity cut-offs or result categories of the reference standard, distinguishing pre-specified from exploratory | 8                  |
|                          | 13a | Whether clinical information and reference standard results were available to the performers/readers of the index test                                 | 8                  |
|                          | 13b | Whether clinical information and index test results were available to the assessors of the reference standard                                          | 8                  |
| <i>Analysis</i>          | 14  | Methods for estimating or comparing measures of diagnostic accuracy                                                                                    | 9                  |
|                          | 15  | How indeterminate index test or reference standard results were handled                                                                                | 9                  |
|                          | 16  | How missing data on the index test and reference standard were handled                                                                                 | NA                 |
|                          | 17  | Any analyses of variability in diagnostic accuracy, distinguishing pre-specified from exploratory                                                      | 8,9                |
|                          | 18  | Intended sample size and how it was determined                                                                                                         | 9                  |
| <b>RESULTS</b>           |     |                                                                                                                                                        |                    |
| <i>Participants</i>      | 19  | Flow of participants, using a diagram                                                                                                                  | 9,10               |
|                          | 20  | Baseline demographic and clinical characteristics of participants                                                                                      | 10, 11             |
|                          | 21a | Distribution of severity of disease in those with the target condition                                                                                 | 10                 |
|                          | 21b | Distribution of alternative diagnoses in those without the target condition                                                                            | 10                 |
|                          | 22  | Time interval and any clinical interventions between index test and reference standard                                                                 | NA                 |
| <i>Test results</i>      | 23  | Cross tabulation of the index test results (or their distribution) by the results of the reference standard                                            | 12                 |
|                          | 24  | Estimates of diagnostic accuracy and their precision (such as 95% confidence intervals)                                                                | 13                 |
|                          | 25  | Any adverse events from performing the index test or the reference standard                                                                            | NA                 |
| <b>DISCUSSION</b>        |     |                                                                                                                                                        |                    |
|                          | 26  | Study limitations, including sources of potential bias, statistical uncertainty, and generalisability                                                  | 17-18              |
|                          | 27  | Implications for practice, including the intended use and clinical role of the index test                                                              | 15-18              |
| <b>OTHER INFORMATION</b> |     |                                                                                                                                                        |                    |
|                          | 28  | Registration number and name of registry                                                                                                               | 18                 |
|                          | 29  | Where the full study protocol can be accessed                                                                                                          | NA                 |
|                          | 30  | Sources of funding and other support; role of funders                                                                                                  | 18                 |

# STARD 2015

---

## AIM

STARD stands for “Standards for Reporting Diagnostic accuracy studies”. This list of items was developed to contribute to the completeness and transparency of reporting of diagnostic accuracy studies. Authors can use the list to write informative study reports. Editors and peer-reviewers can use it to evaluate whether the information has been included in manuscripts submitted for publication.

---

## EXPLANATION

A **diagnostic accuracy study** evaluates the ability of one or more medical tests to correctly classify study participants as having a **target condition**. This can be a disease, a disease stage, response or benefit from therapy, or an event or condition in the future. A medical test can be an imaging procedure, a laboratory test, elements from history and physical examination, a combination of these, or any other method for collecting information about the current health status of a patient.

The test whose accuracy is evaluated is called **index test**. A study can evaluate the accuracy of one or more index tests. Evaluating the ability of a medical test to correctly classify patients is typically done by comparing the distribution of the index test results with those of the **reference standard**. The reference standard is the best available method for establishing the presence or absence of the target condition. An accuracy study can rely on one or more reference standards.

If test results are categorized as either positive or negative, the cross tabulation of the index test results against those of the reference standard can be used to estimate the **sensitivity** of the index test (the proportion of participants *with* the target condition who have a positive index test), and its **specificity** (the proportion *without* the target condition who have a negative index test). From this cross tabulation (sometimes referred to as the contingency or “2x2” table), several other accuracy statistics can be estimated, such as the positive and negative **predictive values** of the test. Confidence intervals around estimates of accuracy can then be calculated to quantify the statistical **precision** of the measurements.

If the index test results can take more than two values, categorization of test results as positive or negative requires a **test positivity cut-off**. When multiple such cut-offs can be defined, authors can report a receiver operating characteristic (ROC) curve which graphically represents the combination of sensitivity and specificity for each possible test positivity cut-off. The **area under the ROC curve** informs in a single numerical value about the overall diagnostic accuracy of the index test.

The **intended use** of a medical test can be diagnosis, screening, staging, monitoring, surveillance, prediction or prognosis. The **clinical role** of a test explains its position relative to existing tests in the clinical pathway. A replacement test, for example, replaces an existing test. A triage test is used before an existing test; an add-on test is used after an existing test.

Besides diagnostic accuracy, several other outcomes and statistics may be relevant in the evaluation of medical tests. Medical tests can also be used to classify patients for purposes other than diagnosis, such as staging or prognosis. The STARD list was not explicitly developed for these other outcomes, statistics, and study types, although most STARD items would still apply.

---

## DEVELOPMENT

This STARD list was released in 2015. The 30 items were identified by an international expert group of methodologists, researchers, and editors. The guiding principle in the development of STARD was to select items that, when reported, would help readers to judge the potential for bias in the study, to appraise the applicability of the study findings and the validity of conclusions and recommendations. The list represents an update of the first version, which was published in 2003.

More information can be found on <http://www.equator-network.org/reporting-guidelines/stard>.



Supplement: bmjopen-2018-021617.draft_revisions.pdf [file bmjopen-2018-021617.draft_revisions.pdf]
